# Supplementary material
Source: PubMed Central journal article supplement (PMC10947132)
Supplement: NIHMS1968684-supplement-Supplement.pdf [file NIHMS1968684-supplement-Supplement.pdf]

**Supplementary Appendix to:**

**CRISPR-Cas9 Editing of the *HBG1*/*HBG2* Promoters to Treat Sickle Cell Disease**

Akshay Sharma, MBBS,<sup>1</sup> Jaap-Jan Boelens, MD, PhD,<sup>2</sup> Maria Cancio, MD,<sup>2</sup> Jane S. Hankins, MD, MS,<sup>1</sup> Prafulla Bhad, MSc,<sup>3</sup> Marjohn Azizy, PharmD,<sup>3</sup> Andrew Lewandowski, PhD,<sup>3</sup> Xiaojun Zhao, PhD,<sup>3</sup> Shripad Chitnis, PhD,<sup>3</sup> Radhika Peddinti, MD,<sup>4</sup> Yan Zheng, MD, PhD,<sup>1</sup> Neena Kapoor, MD,<sup>5</sup> Fabio Ciceri, MD,<sup>6</sup> Timothy Maclachlan, PhD,<sup>3</sup> Yi Yang, PhD,<sup>3</sup> Yi Liu, PhD,<sup>3</sup> Jianping Yuan, PhD,<sup>3</sup> Ulrike Naumann, PhD,<sup>7</sup> Vionnie W.C. Yu, PhD,<sup>3</sup> Susan C. Stevenson, PhD,<sup>3</sup> Serena De Vita, MD, PhD,<sup>3</sup> James L. LaBelle, MD, PhD.<sup>4</sup>

<sup>1</sup>St. Jude Children's Research Hospital, Memphis, TN, USA; <sup>2</sup>Memorial Sloan Kettering Cancer Center, New York, NY, USA; <sup>3</sup>Novartis Institutes for BioMedical Research, Cambridge, MA, USA; <sup>4</sup>The University of Chicago Medicine, Chicago, IL, USA; <sup>5</sup>Children's Hospital Los Angeles, Los Angeles, CA, USA; <sup>6</sup>IRCCS San Raffaele Hospital, Milan, Italy, <sup>7</sup>Novartis Institutes for BioMedical Research, Basel, Switzerland.

## Contents

|                                                                                                                                                                               |    |
|-------------------------------------------------------------------------------------------------------------------------------------------------------------------------------|----|
| Methods.....                                                                                                                                                                  | 4  |
| 1. Preclinical screening using CRISPR-Cas9 tiling of the <i>HBG1</i> and <i>HBG2</i> promoter regions to identify the guide RNA that led to the highest F-cell induction..... | 4  |
| 2. Isolation of CD34+ cells from healthy donors and from individuals with SCD for preclinical evaluation .....                                                                | 5  |
| 3. On-target allelic editing frequency in preclinical samples .....                                                                                                           | 5  |
| 4. Erythroid differentiation and HbF induction.....                                                                                                                           | 6  |
| 5. In vivo engraftment studies in mice.....                                                                                                                                   | 6  |
| 6. Flow cytometric analysis of engrafted human cells in transplantation experiments .....                                                                                     | 6  |
| 7. Identification of candidate off-target sites by computational methods.....                                                                                                 | 6  |
| 8. Identification of candidate off-target sites by using the Pan-Heme cancer panel.....                                                                                       | 7  |
| 9. Identification of candidate off-target sites by using SITE-Seq and validation by rhAmpSeq .....                                                                            | 7  |
| 10. Additional preclinical characterization .....                                                                                                                             | 7  |
| 11. Analysis of gRNA-68 on-target genome editing by using long-read sequencing .....                                                                                          | 7  |
| 12. Mobilization and apheresis.....                                                                                                                                           | 8  |
| 13. OTQ923 manufacturing procedures .....                                                                                                                                     | 8  |
| 14. Conditioning.....                                                                                                                                                         | 9  |
| 15. Hemoglobin fractionation and HbF assessment in clinical samples .....                                                                                                     | 9  |
| 16. F-cell analysis using flow cytometry in clinical samples.....                                                                                                             | 9  |
| 17. On-target editing efficiency in clinical samples .....                                                                                                                    | 9  |
| Results.....                                                                                                                                                                  | 10 |
| 1. Selection of gRNA-68 for use in manufacturing OTQ923.....                                                                                                                  | 10 |
| 2. Identification of gRNA-68.....                                                                                                                                             | 11 |
| 3. Genome location for gRNA-68 within the <i>HBG1/2</i> promoter regions .....                                                                                                | 11 |
| 4. Validation of selected gRNAs .....                                                                                                                                         | 11 |
| 5. gRNA-68–edited HSPCs engraft and reconstitute all hematologic lineages in a preclinical transplant model .....                                                             | 12 |
| 6. Computational, SITE-Seq, and Pan-Heme panel off-target site results and potential translocation events .....                                                               | 13 |
| 7. On-target genome editing using long-read sequencing highlights a complex editing pattern at the targeted region.....                                                       | 14 |
| Figures and Tables .....                                                                                                                                                      | 15 |
| Figure S1: Schematic of OTQ923 manufacture and treatment approach.....                                                                                                        | 15 |
| Figure S2. Selection of gRNA-68 to use for manufacturing OTQ923 .....                                                                                                         | 16 |
| Figure S3. Xenotransplantation of gRNA-68–edited HSPCs .....                                                                                                                  | 18 |

|                                                                                                                                                                              |    |
|------------------------------------------------------------------------------------------------------------------------------------------------------------------------------|----|
| Figure S4. Editing pattern at the <i>HBG1</i> and <i>HBG2</i> promoter regions in cells before transplantation and in recipient NSG mice 26 weeks after transplantation..... | 19 |
| Figure S5. Clonal dynamics in post-infusion samples from trial participants treated with OTQ923 .....                                                                        | 20 |
| Figure S6. Comparison of ddPCR and qPCR .....                                                                                                                                | 23 |
| Table S1. gRNA targeting domains directed to the <i>HBG1</i> and <i>HBG2</i> promoter regions on chromosome 11 .....                                                         | 24 |
| Table S2. Busulfan administration .....                                                                                                                                      | 28 |
| Table S3. Off-target characterization of gRNA-68 .....                                                                                                                       | 29 |
| Table S4. Potential off-target sites identified by both computational and SITE-Seq analysis for gRNA-68 .....                                                                | 30 |
| Table S5. Genes targeted by the Pan-Heme v1.0 panel.....                                                                                                                     | 31 |
| Table S6. Fusions/translocations targeted by the Pan-Heme v1.0 panel .....                                                                                                   | 49 |
| Table S7. Post-infusion adverse events .....                                                                                                                                 | 52 |
| Table S8. Summary of laboratory values for the trial participants at various timepoints after OTQ923 infusion .....                                                          | 60 |
| References .....                                                                                                                                                             | 63 |

## Methods

### 1. Preclinical screening using CRISPR-Cas9 tiling of the *HBG1* and *HBG2* promoter regions to identify the guide RNA that led to the highest F-cell induction

An unbiased guide RNA (gRNA) screen of the *HBG1* and *HBG2* promoter regions was performed to identify regulatory regions within the *HBG1* and *HBG2* promoter regions, disruption of which led to potent induction of fetal hemoglobin (HbF)-immunostaining erythroblasts (F-cells). Seventy-two gRNAs were designed to target the *HBG1* and *HBG2* promoter regions (Table S1). They were screened for F-cell induction in erythroid progeny after electroporation of the preformed RNP complex into human CD34+ cells followed by erythroid differentiation.

Initial gRNA selection was performed computationally, using the human reference genome (build GRCh38), by identifying the 5'-NGG-3' protospacer adjacent motifs (PAM) in the *HBG1* and *HBG2* upstream region and targeting the 20-nucleotide protospacer at the 5' of each site. For the gRNAs chosen, there were no other target sites with 100% sequence homology and a viable PAM elsewhere in the genome. The designed gRNAs were first prepared in a dual-guide RNA (dgRNA) format for the screening assay, then selected guides were prepared in a single-guide RNA (sgRNA) format for follow-up validation. Each gRNA was chemically synthesized and purified by high-performance liquid chromatography (HPLC).

The RNP complex was prepared by adding CRISPR RNA (crRNA) and transactivating CRISPR RNA (tracrRNA) to the Cas9 protein. On day 1, ribonucleic acid–protein (RNP) complexes consisting of Cas9 complexed with each dual-guide RNA (crRNA + tracrRNA) were electroporated into healthy-donor CD34+ hematopoietic stem and progenitor cells (HSPCs), then erythroid differentiation was induced. Briefly, CD34+ cells were thawed and placed in culture overnight in StemSpan SFEM medium (STEMCELL Technologies) with IL-12, stem cell factor (SCF), thrombopoietin (TPO), FLT3L, and penicillin–streptomycin added. For each RNP delivery reaction, 90,000 CD34+ cells from healthy adult donors were concentrated by centrifugation, resuspended in 63  $\mu$ L of P3 nucleofection buffer (Lonza), to which active RNP was subsequently added, and electroporated with a Lonza Nucleofector, using program CA-137. Each crRNA was examined in triplicate and compared to the mock-edited control that delivered the RNP containing only Cas9 and tracrRNA. Positive controls included gRNA-08 (G8), which targets the BCL11A exon 2, and gRNA-57 or gRNA-63, which target the BCL11A binding motif in the *HBG1/2* promoters.<sup>1</sup>

After electroporation, the cells were immediately transferred into 250  $\mu$ L of pre-warmed erythroid differentiation medium (EDM), consisting of Iscove's Modified Dulbecco's Medium (IMDM) (GE Life Sciences, cat. no. SH30228.01), 330  $\mu$ g/mL human holotransferrin (Invitria, cat. no. 777TRF029), 10  $\mu$ g/mL recombinant human insulin (Gibco, cat. no. A1 1382 11), 2 IU/mL heparin (Sigma, cat. no. H3393), 5% human AB serum (Sigma, cat. no. H4522), 2.5 U/mL human erythropoietin (PeproTech, cat. no. 100-064), and 1 $\times$  penicillin–streptomycin–glutamine (Gibco, cat. no. 10378-016). During the initial culture period up to day 7, EDM was further supplemented with 1.38  $\mu$ M hydrocortisone (Sigma, cat. no. H8672), 100 ng/mL human SCF (Life Technologies, cat. no. PHC21 13), and 5 ng/mL human IL-3 (PeproTech, cat. no. 10779-598) to make EDM-I. After 4 days, the cell cultures were diluted in fresh medium. Cultures were maintained for a total of 7 days in the culture conditions described above, after which time half of the cells were analyzed by intracellular staining for HbF expression. Briefly, the cells were washed once with PBS, resuspended in LIVE/DEAD<sup>®</sup> Fixable Violet Dead Cell Stain (Thermo Fisher Scientific, cat. no. L34963; diluted 1:1000 in PBS), and incubated for 30 min. Cells were then washed and stained with 1:50 dilutions of anti-CD71-BV711 (BD Biosciences, cat. no. BDB563767) and anti-CD235a-APC (BD Biosciences, cat. no. BDB551336) antibodies for 30 min. Next, the cells were washed, fixed with fixation buffer (BioLegend, cat. no. 420801), and permeabilized with 1 $\times$  intracellular staining permeabilization wash buffer (BioLegend, cat. no.

421002) according to the manufacturer's instructions. The cells were then incubated with a 1:40 dilution of anti-HbF-PE antibody (Life Technologies, cat. no. MHFH04) in 50  $\mu$ L of 1 $\times$  intracellular staining permeabilization wash buffer (BioLegend, cat. no. 421002) for 20 min at room temperature. The cells were washed twice with 0.2 mL of 1 $\times$  intracellular staining Perm/Wash buffer, resuspended in staining buffer, and analyzed for HbF expression on an LSRFortessa flow cytometer (BD Biosciences). The results were analyzed using FlowJo, and the data were presented as the percentage of F-cells in the viable CD71-positive erythroid cell population.

After 7 days, the efficiency of on-target editing was measured by next-generation sequencing (NGS). The crRNAs that consistently led to the highest F-cell induction in the erythroid progeny (an increase of more than 20% F-cells above the mock-edited control background on day 7) were chosen for further characterization and development. These selected gRNAs were then prepared in an sgRNA format for follow-up validation and were electroporated into CD34<sup>+</sup> HSPCs with Cas9 protein as RNPs. Erythroid differentiation was then induced as described above. For these experiments, a gRNA targeting the *BCL11A* +58 erythroid-specific enhancer was used as a positive control. The single protospacer sequence of the *BCL11A* +58 erythroid-specific enhancer gRNA is located on the positive strand of chromosome 2 at base position 60,495,236-60,495,255 (genome reference build GRCh38) and is 5'-ATCAGAGGCCAAACCTTCC-3'.

## **2. Isolation of CD34<sup>+</sup> cells from healthy donors and from individuals with SCD for preclinical evaluation**

Cryopreserved mobilized peripheral blood-derived CD34<sup>+</sup> cells from healthy donors were purchased from Lonza (cat. no. 2M-101D). Cryopreserved mobilized peripheral blood-derived CD34<sup>+</sup> cells from patients with SCD were supplied by Dr. John Tisdale (National Heart, Lung, and Blood Institute, Bethesda, MD). Bone marrow aspirates from patients with SCD were received from Dr. Edmund Waller (Emory University Hospital, Atlanta, GA). Blood samples from patients with SCD were obtained from Conversant Bio (order no. 4892-A, 5521-A). Peripheral blood mononuclear cells (PBMCs) of patients with SCD were obtained by density centrifugation on Ficoll-Paque PLUS (GE Healthcare Bio-Sciences, cat. no. 17144002), and CD34<sup>+</sup> cells were enriched from them by using a Miltenyi Biotec CD34 MicroBead Kit (cat. no. 130-046-702) and the AutoMACS apparatus in accordance with the manufacturer's instructions. CD34<sup>+</sup> cells were then either cryopreserved and stored in liquid nitrogen or used for expansion in SEM, which contained StemSpan-ACF medium (STEMCELL Technologies, cat. no. 09855) supplemented with 1 $\times$  penicillin-streptomycin, 500  $\mu$ M LHD221, and 50 ng/mL of SCF, TPO, and FLT3L.

## **3. On-target allelic editing frequency in preclinical samples**

For preclinical studies, the percentages of on-target Cas9-gRNA-68 indels were identified by NGS and quantitative polymerase chain reaction (qPCR), as described previously.<sup>1,2</sup> Each indel created at each on-target site of gRNA-68 was sequenced by NGS. The primers for NGS were: *HBG1* forward: 5'-CGCTGAAACTGTGGCTTTATAGAAATT; *HBG2* forward: 5'-GCACTGAAACTGTTGCTTTATAGGAT; *HBG1/2* reverse: 5'-GGCGTCTGGACTAGGAGCTTATTG. qPCR was used to confirm the deletion of approximately 5 kb between the two on-target sites. A primer and probe set targeting the *HBG1/2* loci was obtained from Thermo Fisher Scientific (cat. no. 4400294). The primer sequences were as follows: *HBG* forward: ACGGATAAGTAGATATTGAGGTAAGC; *HBG* reverse: GTCTCTTTCAGTTAGCAGTGG; TaqMan probe (FAM): ACTGCGCTGAAACTGTGGTCTTTATAG. TaqMan qPCR was performed on genomic DNA samples, using the TaqMan Fast Advanced Master Mix (Applied Biosystems, cat. no. 4444557) to quantify each sample in triplicate.  $\Delta\Delta$ Ct values were calculated based on the amplification of a RPPH1 VIC PL reference probe mix (Thermo Fisher Scientific, Hs04930436\_g1). The editing efficiency was calculated using the following equation: total % editing efficiency = % large deletion + (1 - % large deletion)  $\times$  (% indel of *HBG1* + % indel of *HBG2*)/2.

The percentages of on-target Cas9–gRNA-*BCL11A* +58 erythroid-specific enhancer indels were identified by NGS. The primers used for NGS were: *BCL11A* +58 forward: 5'-AGCTCCAAACTCTCAAACCACAGGG; *BCL11A* +58 reverse: 5'-TACAATTTTGGGAGTCCACACGGCA.

#### **4. Erythroid differentiation and HbF induction**

Genome-edited CD34+ cells were subjected to a three-stage erythroid differentiation in liquid culture as previously described.<sup>3</sup> The percentage of F-cells was determined at day 14 of erythroid culture. As described previously for the screening assay, cells were stained intracellularly for HbF, using an anti-human  $\gamma$ -globin antibody directly conjugated with a fluorophore (Life Technologies, cat. no. MHFH014).

HbF protein levels were also determined by ion-exchange HPLC. The percentage of HbF protein was determined at day 18 of erythroid culture by ion-exchange HPLC on a D-10 Hemoglobin testing system (Bio-Rad Laboratories Inc., Hercules, CA, USA). A minimum of 1 million cells were collected then snap frozen. Cell pellets were lysed in water at 50,000 cells per microliter for 5 minutes, followed by 3 freeze thaw cycles. Cellular debris was cleared by centrifugation at 17,400 relative centrifugal field (rcf) for 5 minutes. The hemolysate was analyzed for HbF protein levels and the percentage of HbF protein determined in each sample.

#### **5. In vivo engraftment studies in mice**

Approximately 4 h before injection, NSG (NOD.Cg-Prkdcscid Il2rgtm1Wjl/SzJ) mice were irradiated with 175 cGy of whole-body cesium137 irradiation. Mice were then injected with human CD34+ cells edited using gRNA-68 (i.e., modified in the promoter regions of the duplicated  $\gamma$ -globin genes on chromosome 11), human CD34+ cells edited at the *BCL11A* +58 erythroid-specific enhancer, or mock-edited human CD34+ cells from three donors via a single tail vein injection.

Clinical observations (once daily during weeks 1–2 and at least twice weekly during weeks 3–26/27) and measurements of body weight (on day 1, twice weekly during weeks 1–4, and weekly thereafter) were performed for all groups of mice. Blood samples were collected at 4, 8, 12, 17, and 20 weeks post injection and at necropsy (26/27 weeks post injection) for flow cytometry. In addition, the right hind limb of each mouse was collected at necropsy and bone marrow was extracted from it for flow cytometry. The following mouse (m) and human (h) markers were assessed: mCD45, hCD45, hCD33, hCD3, and hCD19. Bone marrow was collected from selected animals for DNA isolation and NGS analysis of the edited genomic sites.

#### **6. Flow cytometric analysis of engrafted human cells in transplantation experiments**

Bone marrow cells were collected from hind limbs and vertebrae of mice at 26 weeks post transplant. RBCs were lysed, washed, and filtered to remove dead cell aggregates. A small fraction of the whole bone marrow cells was kept and stained with antibodies to hCD45, mCD45, hCD33, hCD3, and hCD19 to study human and lineage chimerism in the bone marrow. The following antibodies were used for flow cytometry: PE-conjugated anti-human CD45 (BD Pharmingen, cat. no. 561866), APC-cy7-conjugated anti-mouse CD45 (BD Pharmingen, cat. no. 557659), APC-conjugated anti-human CD33 (BioLegend, cat. no. 366606), BV421-conjugated anti-human CD3 (BioLegend, cat. no. 317344), and FITC-conjugated anti-human CD19 (BioLegend, cat. no. 302256). The percentage of human chimerism in the bone marrow was defined as % hCD45+ cells/(% hCD45+ cells +% mCD45+ cells).

#### **7. Identification of candidate off-target sites by computational methods**

Genomic loci homologous to the gRNA protospacer sequence were identified using the CasOFFinder algorithm.<sup>4</sup> Based on recent studies,<sup>5-7</sup> analyses focused on identifying and characterizing the

following locus types: 1) sites with 0–4 mismatches adjacent to a 5'-NGG-3' PAM; 2) sites with five mismatches within RefSeq<sup>8</sup> exons adjacent to a 5'-NGG-3' PAM; 3) sites with 0 mismatches adjacent to a noncanonical 5'-NAG-3' PAM; and 4) sites with up to three mismatches with one- or two-nucleotide “bulges” in the gRNA sequence relative to the genomic sequence or adjacent to a 5'-NGG-3' PAM. The computational method described here identified genomic loci homologous to the sgRNA targeting spacer regions that could represent potential off-target editing sites.

#### **8. Identification of candidate off-target sites by using the Pan-Heme cancer panel**

We have developed a custom-content hybrid capture panel–based targeted NGS assay (Pan-Heme v1.0, with the SureSelect panel from Agilent Technologies) targeting 352 genes that are frequently mutated in hematologic malignancies (Table S5), identified by mining mutations in the COSMIC database,<sup>9</sup> plus 83 malignant gene fusion/translocation events (Table S6). The panel was applied to unedited and gRNA-68–edited research materials derived from three healthy donors. Variant analysis, using the MuTect algorithm<sup>10</sup> for single nucleotide variant (SNV) detection and the PINDEL algorithm<sup>11</sup> for indel detection (with an empirically determined detection threshold for variants of at least 1%), identified no editing.

#### **9. Identification of candidate off-target sites by using SITE-Seq and validation by rhAmpSeq**

The SITE-Seq cell-free, unbiased, genome-wide biochemical genome-editing NGS assay enables the selective enrichment and identification of adapter-tagged genomic DNA ends after genome editing.<sup>12</sup> The assay was performed as previously described,<sup>12</sup> with the modification of using PBMC-derived genomic DNA from two individuals and from a pool of multiple individuals at one RNP concentration (64 nM, with a 3:1 molar ratio of gRNA to Cas9), using the gRNA-68 and the Cas9 protein used to manufacture OTQ923. In addition to the two on-target events, the analysis identified 156 potential off-target sites that were further characterized in DNA from unedited and gRNA-68–edited CD34+ cells derived from three healthy donors (with the latter cells being generated using gRNA-68 and the Cas9 protein). Hits situated in annotated repeats<sup>13</sup> were excluded. Technical replicates were analyzed using a multiplexed rhAmpSeq panel from Integrated DNA Technologies before NovaSeq (Illumina) sequencing was performed. BWA-MEM alignment<sup>7</sup> to the human genome reference sequence (build GRCh38) was then performed, followed by variant analysis using the VarDict algorithm<sup>14</sup> (with an empirically determined detection threshold for variants of 1%).

#### **10. Additional preclinical characterization**

**Unit assay:** The Unique Identifier Tagmentation (Unit) NGS assay is an adaptation of the UDiTaS assay,<sup>15</sup> which identifies on-target centric genome rearrangements in addition to the typical CRISPR-Cas9 on-target indels. Like UDiTaS, the Unit assay uses a Tn5 transposase to fragment and tag double-stranded DNA with oligonucleotides containing unique molecular identifiers, which are used to remove PCR duplicates during analysis, and sequences to enable NGS library construction.

**Karyotyping:** Standard analysis of 300 cells in metaphase, scoring for chromosomal number changes and gross chromosomal aberrations, and 50 metaphases for karyotype for more granular analysis of chromosomal integrity, was performed in genome edited and unedited CD34+ cells.

#### **11. Analysis of gRNA-68 on-target genome editing using long-read sequencing**

Genomic DNA was extracted from gRNA-68–edited CD34+ cells derived from three donors (donors 1, 2, and 3) or from unedited cells (no sgRNA or Cas9) from the same donors. A PCR amplicon spanning the *HBG1* and *HBG2* loci edited by gRNA-68 at genomic coordinates chr11:5,250,097-5,250,116 and chr11:5,255,025-5,255,044 (in human genome reference build GRCh38), respectively, was designed with Primer3 (version 2.3.6), using the default parameters.<sup>16</sup> For unedited samples, the PCR primers should amplify an amplicon approximately 6.2 kb in length, as depicted in the figure below.

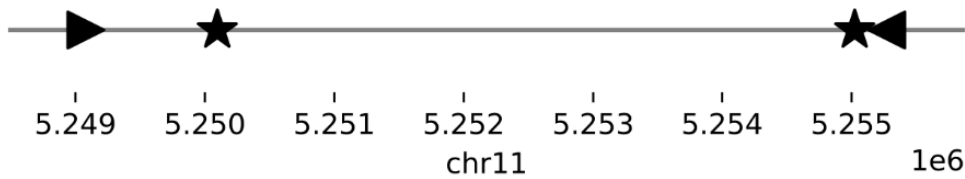

The schematic diagram shows the region on chromosome 11 surrounding the genomic coordinates of the two gRNA-68 homology sites (chr11:5,250,097-5,250,116 and chr11:5,255,025-5,255,044, marked with asterisks), as well as the primer binding sites of the forward (right-pointing arrow) and reverse (left-pointing arrow) primers used for long-range amplicon sequencing. Primer sequences used for long-range amplification and genomic coordinates of the primer binding sites are shown in the table below.

| Primer name     | Primer sequence 5' – 3'  | Genomic coordinates       |
|-----------------|--------------------------|---------------------------|
| HBG_LA_FWD5     | GAAAGATGAAAGTTCTTCTACTGG | chr11:5,249,081-5,249,105 |
| GCR-001 off rev | TGAGACTAAGACGTGTCCCA     | chr11:5,255,253-5,255,272 |

Genome editing with gRNA-68 should produce a product approximately 1.2 kb in length, resulting from the excision of the ~5-kb fragment between the two gRNA-68 targeting sites in *HBG1* and *HBG2*. Gel-purified PCR amplicon pools were subjected to NGS library construction with the SMRTbell Express Template Preparation Kit v2 (Pacific Biosciences, cat. no. 100-938-900), used in accordance with the manufacturer's recommendations, and the products were loaded onto a Sequel sequencer. Raw sequencing data were converted to sequencing reads in the FASTQ format (Cockett al., 2010) with SMRT Link (v.7.0) (Pacific Biosciences), running the circular consensus (CCS) pipeline with the CCSDMLT settings. Reads were aligned with pbmm2 (PacBio/Bioconda version 1.0.0) and screened for structural variants by using pbsv (PacBio/Bioconda version 2.2.1) and SVIM.<sup>17</sup> De novo motifs were detected using the HOMER algorithm.<sup>18</sup>

## 12. Mobilization and apheresis

Red blood cell (RBC) exchange transfusions were performed for at least 2 months before the first mobilization of CD34+ cells with plerixafor. Before starting plerixafor mobilization, participants were assessed by the study investigator to confirm that they were still eligible to proceed with apheresis (according to local institutional guidelines). Participants received an RBC exchange transfusion within 7 days before the start of the mobilization/apheresis cycle. Each participant underwent stem cell mobilization with plerixafor, and PBMCs were collected by apheresis, as described previously.<sup>19</sup>

## 13. OTQ923 manufacturing procedures

A schematic of OTQ923 manufacturing is shown in Figure S1. OTQ923 is an autologous hematopoietic stem and progenitor cell product generated in accordance with current Good Manufacturing Practice (cGMP) by a continuous manufacturing process that uses cryopreserved mobilized peripheral apheresis (mAph) product from the patient. Upon receipt at the manufacturing facility, the mAph product is thawed and washed, and CD34+ cells are isolated using a closed, automated, sterile, micro-bead system (CliniMACS Prodigy System, Miltenyi Biotec). CD34+-enriched cells are incubated in cell culture medium containing Rh TPO, rh SCF, rh Ft-3L, and human serum



albumin (HSA). Genome editing is then performed by electroporation in a buffer containing the RNP complex prepared by mixing Cas9 and gRNA-68. After electroporation, the cells are expanded in the presence of cytokines and an aryl hydrocarbon receptor antagonist, LHD221 (which is similar to, but more potent than SR1<sup>20</sup>). After culture, the cells are washed, resuspended in cryopreservation medium (HSA and CryoStor<sup>®</sup>CS10 solution), and cryopreserved. Quality control release assays are performed on cryopreserved material before batch release.

#### **14. Conditioning**

Before OTQ923 infusion, participants received conditioning with busulfan administered IV every 6 hours, with pharmacokinetic monitoring being used to achieve a total cumulative exposure of 80–100 mg\*h/L over 4 days (Table S2).

#### **15. Hemoglobin fractionation and HbF assessment in clinical samples**

Blood samples were collected to assess the hemoglobin fractionation by capillary electrophoresis, based on the protocol-defined schedule of assessment. Samples for hemoglobin fractionation and HbF assessment were analyzed locally.

#### **16. F-cell analysis using flow cytometry in clinical samples**

Whole-blood samples were fixed with 0.05% glutaraldehyde, and the cells were permeabilized with detergent (0.1% Triton X100). The permeabilized cells were stained with a phycoerythrin (PE)-conjugated monoclonal antibody specific for fetal hemoglobin (Life Technologies MHFH04; clone HbF-1). Data were acquired on a FACSCantoII flow cytometer running BD FACSDIVA™ software, version 9.0.1, and were analyzed with DeNovo FCS Express 6. Scatter gates were set to collect singlet erythroid events, and HbF was estimated by fluorescence in the PE channel.

#### **17. On-target editing efficiency in clinical samples**

Genomic DNA was extracted from peripheral blood nucleated cells and from bone marrow–derived CD34+ cells at various time points. CD34+ cells were isolated from bone marrow aspirate samples (from Participant 1 at month 12) with a Ficoll-Paque PREMIUM mononuclear cell isolation kit (GE Healthcare, USA) followed by a CD34 MicroBead Kit (Miltenyi Biotec, Bergisch Gladbach, Germany).

The on-target allelic editing of *HBG1* and *HBG2* was assessed using the Illumina amplicon sequencing method. Specifically, each sample was sequenced in duplicate, together with its corresponding baseline sample as the control. A sequencing library was generated for each sample with two rounds of PCR amplification. The target-specific primer sequences for both *HBG1* and *HBG2* are GGTC AAGTTTGCCTTGTC AAGGCT and TACAGGCCTCACTGGAGCTA. Amplicon libraries were sequenced on an Illumina MiSeq sequencer with v3 chemistry and 2 × 300-bp paired-end sequencing. Demultiplexed FASTQ files were processed by the following steps: quality clipping, mapping (GRCh38), filtering, and downsampling to roughly 200,000 if more than 200,000 reads were aligned to a target region. Reads aligning outside the expected target regions were removed, as were reads with ambiguous alignments (having a mapping quality of 0). Aligned reads were used to determine the target allelic editing frequency and to identify unique indel changes by using a CAS9-aware version of VarDict.<sup>14</sup> Reported variants were also filtered using replicates and baseline controls to reduce false-positive variants. The threshold for allele frequency was set to >0.01%; deletions and insertions with a length of 1 bp and a frequency less than 0.02% are not considered. Data for *HBG1* and *HBG2* are presented as the total percentage edit, using the formula “total % editing efficiency = % large deletion + (1 – % large deletion) × (% indel of *HBG1* + % indel of *HBG2*)/2” (Figs. 2E and 2F). To calculate the percentage edit for *HBG1* and *HBG2*, individual fractions were calculated separately for *HBG1* and *HBG2* and applied as “(1 – % large deletion) × (% indel of *HBG1* or % indel of *HBG2*).”

A ddPCR method of detection by amplification in individual water-in-oil droplets was implemented to detect the approximately 5-kb genomic deletion in patient whole-blood or bone marrow samples. Droplets were analyzed with a Bio-Rad QX200 droplet reader, and data were processed with QuantaSoft\_v1.7.4 software that included automatic Poisson correction. In this assay, specific primers for *HBG2* were used to measure the relative copy number of the gene. Genomic DNA extracted from patient samples collected post OTQ923 infusion had a decreased signal for the gene of interest (*HBG2*, on chromosome 11) relative to that for a stable, unedited reference albumin gene (*ALB*, on chromosome 4). The ratio of the concentrations (in copies/20  $\mu$ L) of the *HBG2* gene and the *ALB* reference gene was reported as the editing percentage (%). As the assay detects the wildtype sequence (the unedited target gene), the percentage of edited cells is the inverse (1 – ratio) of the relative ratio between the two targets. Results were reported as the percentage edit of the inverse (1 – ratio). The ddPCR assay used for clinical samples replaced the assessment by qPCR of the approximately 5-kb genomic deletion in preclinical samples. The correlation between the two methods is represented in Figure S6.

## Results

### 1. Selection of gRNA-68 for use in manufacturing OTQ923

An unbiased CRISPR-Cas9 tiled gRNA screen of the *HBG1* and *HBG2* promoter regions identified several gRNAs that resulted in the induction of HbF-positive erythroid cells or F-cells (Fig. S2A). Erythroblasts derived from genome-edited or unedited control CD34+ cells were analyzed by flow cytometry for HbF expression. Genome-edited CD34+ cells and mock-edited cells (i.e., cells treated with RNP containing only Cas9 and tracrRNA as a background control) generated similar fractions of CD71+ erythroblasts, indicating that editing did not adversely affect erythroid differentiation. Delivery of these gRNA RNPs to CD34+ cells resulted in an increased percentage of erythroid cells containing HbF (up to 62.8%), as compared to the percentage in mock electroporated cells (16.9%), at day 7 after electroporation. A gRNA (G8) targeting exon 2 of *BCL11A* was included as a positive control for this initial screening. Several of the dgRNAs targeting the *HBG1* and *HBG2* promoter regions resulted in higher F-cell levels than were obtained with G8 as well as with gRNAs targeting the known *BCL11A* target motif in the *HBG1*/*HBG2* promoters<sup>1</sup> (Fig. S2A). Editing at the *HBG1* and *HBG2* promoter regions was determined on day 7 after electroporation by NGS to determine the percentage of edited alleles in the cell population. Genome editing percentages for the *HBG1* and *HBG2* promoter regions were high in many of the cell cultures electroporated with RNPs containing Cas9, the crRNA of the given targeting domain, and tracrRNA, but not in mock-edited control cells (in which the RNP contained only Cas9 and tracrRNA). In particular, the dgRNAs that resulted in an increase in F-cells of more than 20% above the mock-edited control background on day 7 had a range of 5.92% to 77.84% edited alleles for the *HBG1* or *HBG2* target loci. Based on their ability to induce F-cells to levels more than 20% higher than those in mock-edited cells, which correlated with their genome editing efficiency, six gRNAs were selected for further characterization: gRNA-01, gRNA-08, gRNA-10, gRNA-22, gRNA-54, and gRNA-68. The location of these gRNAs relative to the *HBG1*/*HBG2* genes and the known transcription factor binding motifs in the *HBG1*/*HBG2* promoter regions are shown in Figure S2B. During further validation experiments, a gRNA targeting the *BCL11A* +58 erythroid-specific enhancer was included as a positive control in addition to gRNA-01, gRNA-08, gRNA-10, gRNA-22, gRNA-54, and gRNA-68. The editing efficiency and F-cell induction obtained after editing with these gRNAs and Cas9, followed by erythroid differentiation are shown in Figures S2C and S2D. Erythroid progeny of CD34+ cells edited with gRNA-

68 consistently produced the highest percentage of F-cells; hence, gRNA-68 was chosen for further validation in the clinical trial.

## 2. Identification of gRNA-68

The 100-nucleotide sequence of gRNA-68 is as follows:

5'-

ACUGAAUCGGAACAAGGCAAGUUUUAGAGCUAGAAAUAGCAAGUUAAAAUAAGGCUAGUCCGUUAUCA  
ACUUGAAAAAGUGGCACCGAGUCGGUGCUUUU-3'

The 20-nucleotide spacer sequence of gRNA-68 is as follows:

5'- ACUGAAUCGGAACAAGGCAA-3'

The 20-nucleotide protospacer sequence for gRNA-68 is as follows:

5'- ACTGAATCGGAACAAGGCAA-3'

The three-nucleotide canonical 5'-NGG-3' PAM sequence 3' to the protospacer sequence for gRNA-68 is as follows:

5'-AGG-3'

## 3. Genome location for gRNA-68 within the *HBG1/2* promoter regions

We mapped the binding site of gRNA-68 in the promoter regions of *HBG2* and *HBG1* and found that it is not near any known transcription factor binding site (Fig. S2B). As a result, none of the small indels observed around the cutting site at the *HBG2* or *HBG1* locus with a frequency higher than 0.1% are likely to destroy nearby transcription factor binding sites. The ~5-kb deletion was the most dominant indel in gRNA-68–edited cells from healthy donors (Fig. 1C) and from patients with SCD in preclinical studies (Fig. 1E); this is similar to observations with reference gRNA-57 and gRNA-63, which disrupt the known BCL11A binding motif in the *HBG1/2* promoters, as reported in the literature.<sup>1</sup> Although we have been unable to characterize fully the fusion site of the newly reconstituted *HBG2*–*HBG1* fusion gene that is formed after the ~5-kb deletion, in which the *HBG2* promoter sequence is fused to the downstream *HBG1*, the reconstituted fusion gene is likely to have various insertions or deletions. Likewise, we observe various destructive edits at the gRNA binding site in 60% to 80% of sequencing reads, depending on the sample. In most cases, one of two edits is observed: either a six-nucleotide deletion at positions 15–21 of the binding site (AAGGCA deleted, 45% to 60% of destructive edits, 31% to 47% of reads) or a five-nucleotide deletion at positions 14–19 of the binding site (CAAGG deleted, 16% to 22% of destructive edits, 11% to 17% of reads). Known transcription factor binding sites (Fig. S2B) remain intact in the resulting allele in >97% of sequencing reads.

## 4. Validation of selected gRNAs

The lead gRNA (gRNA-68) was selected from among the six gRNAs chosen for further characterization (gRNA-01, gRNA-08, gRNA-10, gRNA-22, gRNA-54, and gRNA-68) based on several factors, including an initial characterization of potential off-target sites using computational methods, the percentage of F-cells obtained in an erythroid differentiation assay, and an *in vivo* assessment of the engraftment and multi-lineage differentiation potential of the genome-edited CD34+ HSPCs based on their long-term engraftment. Figure S2C illustrates the percentage of genome editing for each selected guide and Figure S2D shows the percentage of F-cells determined at day 14 of erythroid culture. In this assay, mock-electroporated cells served as F-cell background controls and the F-cell percentage of the controls was subtracted from the F-cell value for the test gRNA. A positive control targeting the *BCL11A* +58 erythroid-specific enhancer region was included in this experiment. gRNA-68 resulted in

the highest F-cell induction, with the level being  $37.6\% \pm 4.1\%$  (mean  $\pm$  SD) above background, as compared to  $16.1\% \pm 3.3\%$  (mean  $\pm$  SD) above background for the cells in the positive control group that were treated with the *BCL11A* +58 erythroid-specific enhancer editing gRNA (Fig. S2D). From these analyses, gRNA-68 was selected as the lead guide for clinical evaluation based on its ability to not only induce HbF upon erythroid differentiation but also maintain hematopoietic stem cell (HSC) function and stability of the editing. As shown in Figure S2B, gRNA-68 has two discrete expected on-target sites 246 bp upstream of the transcriptional start in the nearly identical *HBG1* and *HBG2* genes (GRCh38 chr11:5,255,025–5,255,044 and GRCh38 chr11:5,250,097–5,250,116, respectively), which are approximately 5 kb apart.

As an additional confirmation of gRNA-68 ability to induce HbF, HbF protein was determined in the erythroid differentiation assay using edited CD34+ HSPCs from both health donors (n=2) and sickle cell disease patients (n=3). Fig. 1 shows the percentage of HbF protein determined by ion-exchange HPLC analysis at day 18 of erythroid culture for the gRNA-68 edited samples compared to the mock electroporated controls. gRNA-68 resulted in the induction of HbF protein up to  $20.9\% \pm 0.2\%$  (mean  $\pm$  SD) compared with  $12.0\% \pm 0.3\%$  in the mock-edited control samples derived from edited healthy donor HPSCs and in SCD patient derived samples, HbF protein levels increased up to  $26.2\% \pm 2.9\%$  compared to  $16.1\% \pm 2.3\%$  in mock-edited controls. These results corroborate the F-cell data obtained by flow cytometry with gRNA-68 edited samples.

### **5. gRNA-68–edited HSPCs engraft and reconstitute all hematologic lineages in a preclinical transplant model**

Flow cytometry analysis of the bone marrow of NSG mice at 26 weeks post transplant showed high engraftment levels of 30–50% in the gRNA-68–edited group and 35–60% in the *BCL11A* +58 erythroid-specific enhancer–edited and mock-edited groups. Figure S3A shows the average percentage of human CD45 cells (huCD45) found in isolated bone marrow cells for each treatment group at week 26 (the terminal end point). Lineage reconstitution was similar in the mock-edited, *BCL11A* +58 erythroid-specific enhancer–edited, and gRNA-68–edited groups for each donor (Fig. S3B). In both the gRNA-68–edited and *BCL11A* +58 erythroid specific-enhancer–edited groups, an average of 78% genome editing was achieved in CD34+ cells from the three donors before xenotransplantation (Fig. S3C). When the proportions of genome-edited cells before xenotransplantation and after 26 weeks of reconstitution were compared, the percentage of edited cells was 71.1% and 80.9% after 26 weeks of reconstitution for the gRNA-68–edited and *BCL11A* +58 erythroid-specific enhancer–edited groups, respectively, suggesting that the gRNA-68–edited CD34+ cells were indeed long-term repopulating HSCs. Additionally, the frequency of the ~5-kb deletion was maintained throughout the reconstitution period until 26 weeks post transplant. These data demonstrate that gRNA-68–edited CD34+ cells persist in transplant-recipient animals for at least 26 weeks post transplantation.

To determine whether there had been any clonal evolution or expansion events, genomic DNA from the bone marrow of a subset of animals was sequenced at the on-target site to analyze the editing pattern after 26 weeks of engraftment, which was compared to the editing pattern before dosing. The indels generated by CRISPR-Cas9 editing in each cell serve as a unique barcode that enables clonal tracking of each genome-edited cell and its respective progenies. In this experiment, the representation of each genome-edited clone was determined in gRNA-68 genome-edited CD34+ cells before transplantation and then again in the hematopoietic system after 26 weeks of engraftment (Fig. S4). NGS data demonstrated clonal heterogeneity comprising major and minor

clones in gRNA-68 cells, as would be expected in any hematopoietic system. By tracking the edited clones, several key consistencies were observed: (1) CD34+ cells from different donors generated similar clonal patterns; (2) recipients of transplanted CD34+ cells derived from the same donor exhibited similar clonal patterns; and (3) the clonal patterns before transplantation and after 26 weeks of reconstitution were very similar. The heterogeneity of the editing pattern in the cells analyzed before dosing was mostly maintained in the cells harvested after 26 weeks of engraftment, indicating that no clonal expansion had occurred. We acknowledge the limitation of this method to track clonal expansion, given that the most common and predominant editing outcome was the 5-kb deletion. However, even the cells with the 5-kb deletion had diverse destructive edits at the fusion junction. Together, these data strongly demonstrate the reproducibility and persistence of the editing patterns generated by gRNA-68. Selection of stem cells for homing and engraftment was expected and was manifested as a reduction in the number of clones post transplant; however, the hematopoietic system reconstituted from gRNA-68–edited CD34+ cells remained polyclonal and diverse upon undergoing transplantation and reconstitutive hematopoietic stress. In animals dosed with gRNA-68–edited CD34+ HSCs, despite the larger clonal variation observed post transplantation, there was no reproducible pattern of clonal dominance, nor was any tumor with a human cell origin detected. Such clonal variation was probably the result of stochastic fluctuation, a phenomenon that occurs in any given normal hematopoietic system.<sup>21</sup> In summary, a high level of human cell engraftment with multi-lineage reconstitution was observed in NSG mice throughout the 26 weeks of the post-transplant monitoring period.

## **6. Computational, SITE-Seq, and Pan-Heme panel off-target site results and potential translocation events**

The computational screen identified 163 potential off-target sites, of which 162 were characterized in unedited and gRNA-68–edited materials derived from three donors by single-plex PCR-based targeted NGS analysis and showed no off-target editing (Table S3). One site with five nucleotide mismatches relative to the gRNA spacer sequence, which is represented five times on chromosome 1 in both intergenic and pseudogene regions, could not be amplified because of its non-unique and repetitive genomic context. However, this site represents one of the lowest-risk sites, with only 15 of 20 nucleotides matching the gRNA spacer sequence. SITE-Seq analysis identified 156 hits, excluding sites with an edit distance larger than 6 or more than two bulges and sites in repetitive regions. Characterization in unedited and gRNA-68–edited materials derived from three donors by using rhAmpSeq targeted NGS analysis showed only editing of the two on-target sites on chromosome 11. Using the Pan-Heme panel of common hematologic oncogenes and tumor suppressors, analysis of the coding regions (and some intronic regions) of 352 genes that are frequently mutated in hematologic malignancies and 83 malignant gene fusion/translocation events (Tables S5 and S6) identified no bona fide candidate off-target editing indels or SNVs in gRNA-68–edited CD34+ cells derived from three healthy donors. Table S4 lists the 40 unique sites that are common to the computational and SITE-Seq analyses; none of these sites are present on the Pan-Heme panel. Using these complementary unbiased genome-wide methodologies, we detected no potential off-target editing or unintended genomic alterations of OTQ923 (Table S3).

Analysis of research material generated from three donors, unedited and gRNA-68–edited, identified dicentric fusions between edited sister chromosomes at a rate of approximately 1–2%. As expected, these fusions were not detected in mice after xenotransplantation, and no translocations to other genomic loci were detected. HSCs from individuals with SCD were not evaluated for this analysis as no off-target editing was identified in healthy donor CD34+ cells after xenotransplantation; and this is expected to be a strictly “on-target” effect. The dicentric sister chromosome fusions identified

here are consistent with previous results<sup>15</sup> and will probably be detected at similar rates with any high-efficiency gRNA.

Standard analysis of 300 cells in metaphase, scoring for chromosomal number changes and gross chromosomal aberrations, and 50 metaphases for karyotype for more granular analysis of chromosomal integrity, was performed in genome edited and unedited CD34+ cells. No alterations in chromosome number or structure in gRNA-68–edited research material were identified in this assay.

### **7. On-target genome-editing using long-read sequencing highlights a complex editing pattern at the targeted region**

Long-range sequencing analysis of PCR amplicons spanning the *HBG1* and *HBG2* loci in the OTQ923 cell product was performed to characterize the on-target loci for large indels, changes in or creation of regulatory elements, and the formation of novel fusion genes after genome editing. Analysis of OTQ923 produced from multiple donors (n = 8) confirmed the creation of a ~5-kb deletion between the two gRNA-68 on-target cut sites, which was the most abundant allele. Analysis of gRNA-68 on-target genome editing by using long-read sequencing identified no other large structural variations.<sup>17,18</sup>

It is possible that the ~5kb deletion actually represents a broader array of larger deletions. Alleles with deletions spanning larger regions outside our primer binding sites would not be detected with our assay. Our primers were designed to bind 1 Kb upstream and 250 bp downstream of the gRNA-68 homology sites. The length of the sequences we observed was narrowly distributed around 1.2 kb in edited samples, in addition to the wildtype peak at 6.2 kb.

We searched for novel open reading frames (ORFs) in the gRNA-68–edited sequences by using ORFfinder.<sup>22</sup> The vast majority of the filtered ORFs were supported by fewer than 10 reads. The most abundant putative ORF was 57 amino acids long and was supported by only 36 reads, which accounted for only 0.005% of the total edited reads and were probably the result of technical noise.

We screened for regulatory elements by comparing the motifs resulting from gRNA-68 editing to position weight matrices for human transcription factors. Neither the most abundant nor the best matches for any motif enriched in sequences from gRNA-68–edited samples had perfect matches with known transcription factor binding sites, and many lacked multiple key residues. Therefore, the ability of those sites to recruit a transcription factor is assumed to be compromised.

The location of  $\gamma$ -globin–repressive BCL11A binding sites identified by Liu et al.<sup>23,24</sup> and the ~5-kb deletion created by gRNA-68 were also compared. Our data suggest that one copy of the BCL11A binding site is removed, along with the *HBG2* locus, by the ~5-kb excision, whereas the second copy remains intact with the *HBG1* locus, which implies a novel mechanism for HbF induction by gRNA-68 editing.

## Figures and Tables

### Figure S1. Schematic of OTQ923 manufacture and treatment approach

After a participant agrees to participate in the study and signs the consent form, screening evaluations are performed to assess their eligibility. Once their eligibility is confirmed, the participant is enrolled on the study, discontinues hydroxyurea (if taking it previously), and begins regular exchange transfusions. After at least 2 months of receiving exchange transfusions, the participant undergoes CD34+ cell mobilization using plerixafor and apheresis to collect the cells. The apheresis product is cryopreserved and shipped to the central manufacturing site, and a rescue aliquot containing at least 2 million CD34+ cells per kilogram of body weight of the recipient is cryopreserved and kept on site. This process of cryopreservation and apheresis is repeated until sufficient cells have been collected and an adequate dose of OTQ923 has been manufactured. After cryopreservation, the cellular product undergoes release testing and quality assurance and, upon release, it is shipped to the clinical site. The participant then undergoes myeloablative conditioning with busulfan and receives the OTQ923 product infusion. After the infusion, the participant remains hospitalized until engraftment. They are then followed as an outpatient on study for at least 2 years and for an additional 13 years on a long-term follow-up protocol.

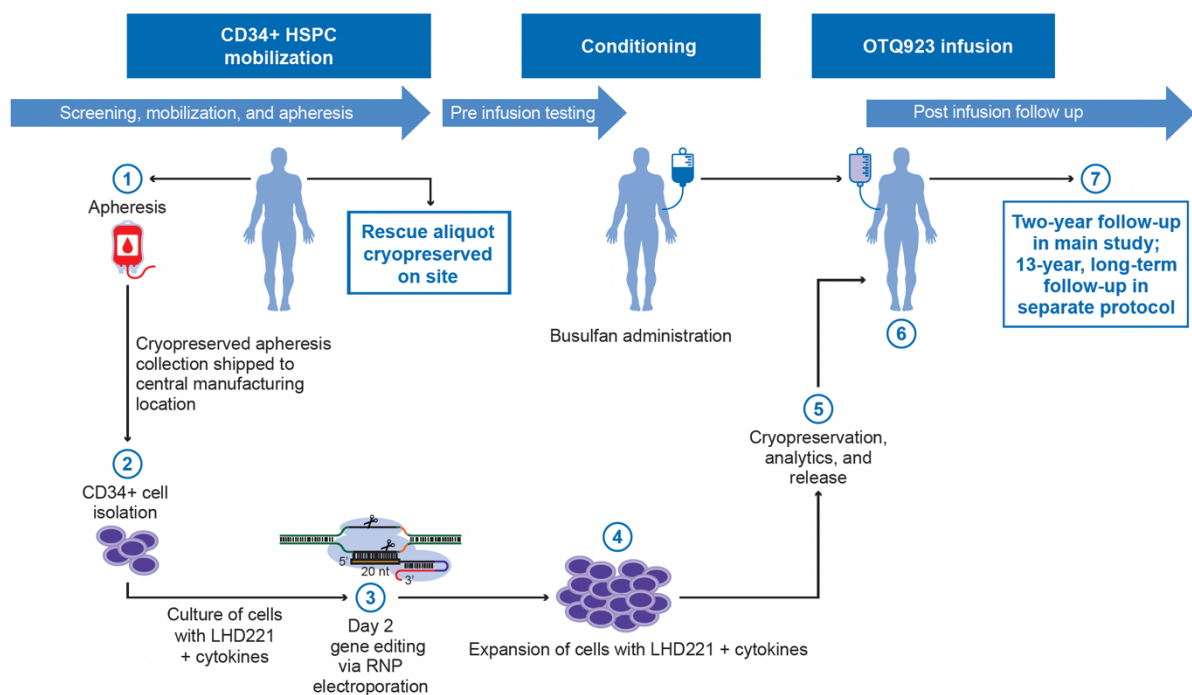

### Figure S2: Selection of gRNA-68 to use for manufacturing OTQ923

A tiled CRISPR/Cas9 gRNA screening of *HBG1* and *HBG2* promoter regions for *cis*-regulatory elements that repress transcription was performed. An unbiased panel of 72 tiled gRNAs was designed to interrogate the *HBG1* and *HBG2* promoter regions (Table S1). Guide RNA selection was performed computationally, using the human reference genome (build GRCh38), by identifying the 5'-NGG-3' protospacer adjacent motifs (PAMs) in the *HBG1* and *HBG2* upstream region and targeting the 20-nucleotide protospacer at the 5' of each motif. All gRNAs represented unique sequences in the genome. The designed gRNAs were first prepared in a dual-guide RNA format for the screening assay. On day 1, RNP complexes consisting of Cas9 complexed with each dual-guide RNA (crRNA + tracrRNA) were electroporated into healthy-donor CD34+ hematopoietic stem and progenitor cells (HSPCs), after which erythroid differentiation was induced. **(A)** Percentage of HbF-immunostaining cells (F-cells) according to the gRNA used, measured by immunoflow cytometry after 7 days of erythroid differentiation. Mock-edited cells (as a negative control) received RNP containing Cas9 and tracrRNA only. Positive controls included cells treated with gRNA-G8 (solid black bar), which targets the *BCL11A* exon 2, and gRNA-57 or gRNA-63 (purple colored bars), which target a known *BCL11A* binding motif.<sup>1</sup> The teal colored bar corresponds to induction of F-cells by gRNA-68. The results are shown as the mean  $\pm$  standard deviation ( $n = 3$  replicates). **(B)** Diagram of the *HBG1* and *HBG2* promoter sequences with known regulatory protein binding sites shown in green. The numbering indicates the distance from the transcription start site (TSS) at position +1. Guide RNAs that generated the highest percentages of F-cells (gRNAs 08, 10, 22, 54, and 68) are indicated as red arrows. **(C)** Indel types for the indicated guide RNAs are shown. CD34+ HSPCs were electroporated with RNPs consisting of Cas9 complexed with the indicated single gRNAs (sgRNAs), induced to undergo erythroid differentiation, and analyzed for indel frequency via NGS after 7 days. The graph shows the mean  $\pm$  standard deviation (SD) ( $n=4$  experiments) using CD34+ HSPCs from two different donors. **(D)** F-cell induction after editing by the indicated sgRNAs and erythroid differentiation. CD34+ HSPCs were electroporated with RNPs as described for panel C and were analyzed by immuno-flow cytometry for the F-cell percentage after 14 days of erythroid differentiation. The bar chart shows the results for each sgRNA as the mean  $\pm$  SD minus the average background level in negative control cells electroporated with Cas9 only ( $n = 4$ ) using CD34+ HSPCs from two different donors. Note that sgRNA-68 produced the highest percentage of F-cells. One-way ANOVA with Dunnett's multiple comparisons test was performed: ns, not significant; \* $P < 0.05$ ; \*\* $P < 0.01$ ; \*\*\* $P < 0.0001$ .



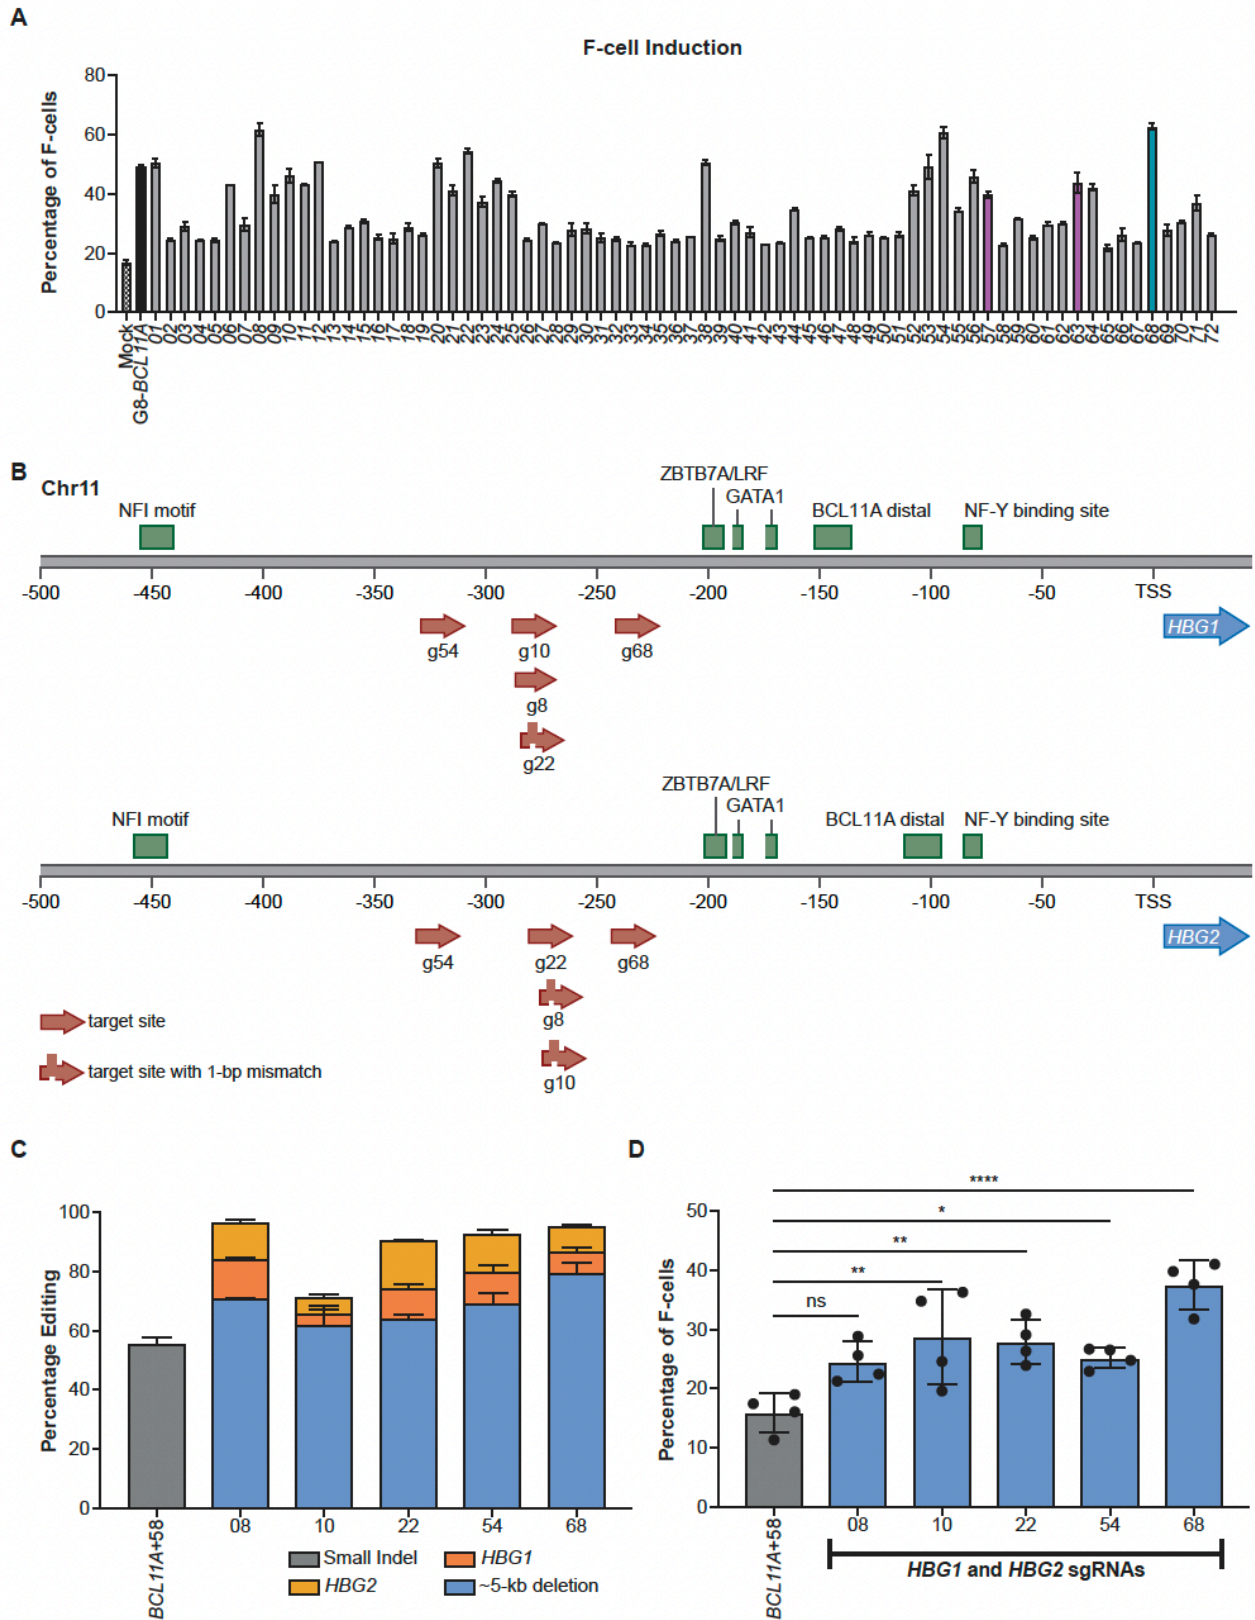

**Figure S3. Xenotransplantation of gRNA-68–edited HSPCs.**

Healthy-donor CD34+ HSPCs were electroporated with RNP consisting of Cas9 complexed with sgRNA-68 or sgRNA targeting the *BCL11A* +58 erythroid-specific enhancer as a positive control. As a negative control, HSPCs were electroporated with Cas9 only (i.e., mock edited). Cells were transplanted into lethally irradiated NSG mice and analyzed after 26 weeks. **(A)** Human chimerism in recipient mouse bone marrow, as evaluated by the expression of human-specific CD45 (hCD45). Symbols represent results from the three different CD34+ cell donors, designated on the x-axis as 1, 2, and 3. **(B)** Multi-lineage reconstitution of bone marrow by edited HSPCs. The bar charts show the mean  $\pm$  SD from three biological replicate experiments for each CD34+ cell donor ( $n = 3\text{--}40$  mice per group). **(C)** Indel frequencies of input cells pre-transplantation and of donor-derived hCD45+ cells 26 weeks post transplantation ( $n = 3\text{--}6$  mice per group). Data are shown as the mean  $\pm$  SD.

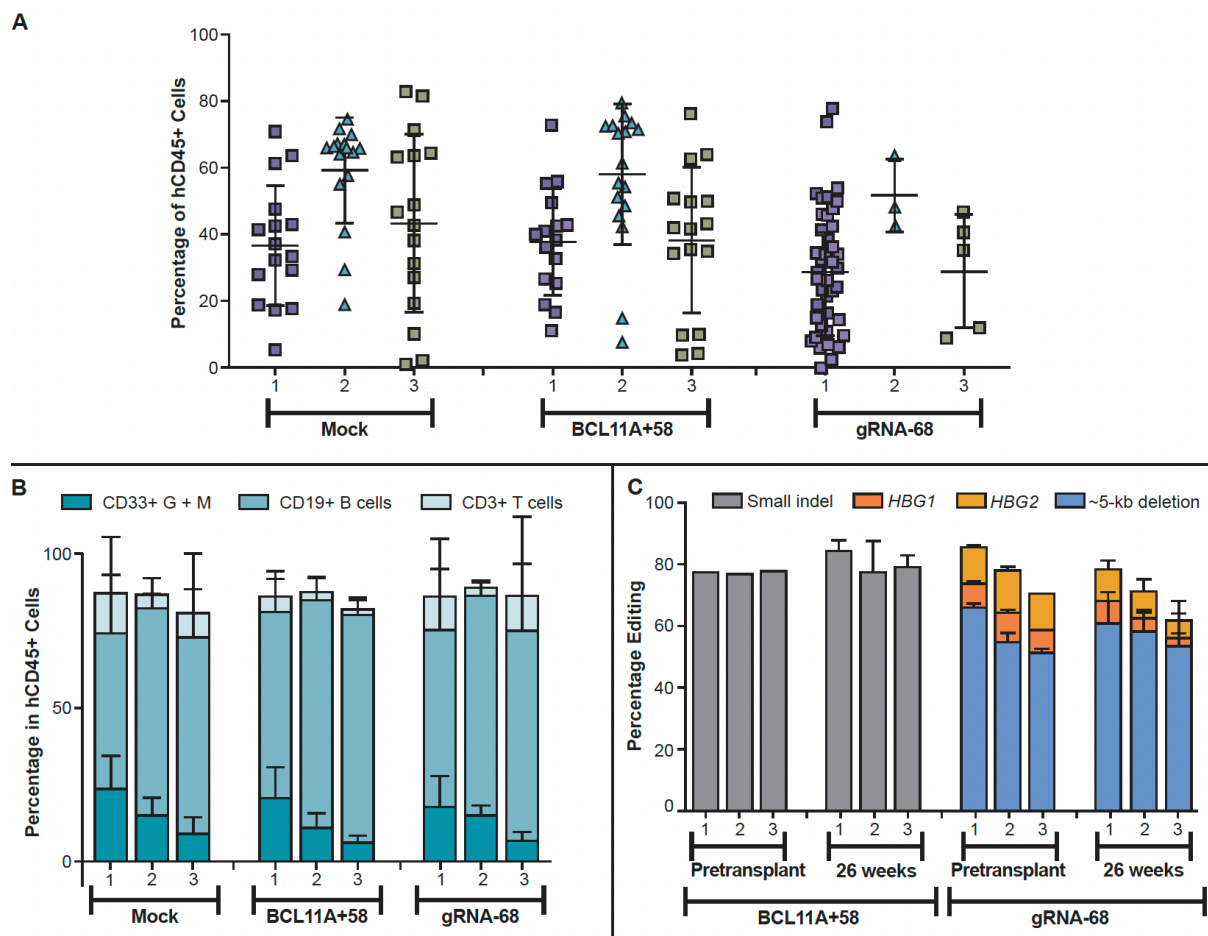

**Figure S4. Editing pattern at the *HBG1* and *HBG2* promoter regions in cells before transplantation and in recipient NSG mice 26 weeks after transplantation.**

On-target edits in gRNA-68–edited cells included small indels at the RNP cleavage sites in the *HBG1* and *HBG2* promoters or a ~5-kb deletion resulting from simultaneous RNP cleavage at *HBG1* and *HBG2* followed by the loss of the intervening DNA. The ~5-kb deletion resulted in a single chimeric *HBG2–HBG1* fusion gene with the *HBG2* promoter sequence fused to the downstream *HBG1* gene. The edited cells that were xenotransplanted into NSG mice are shown as the percentage of the total engrafted human CD45+ cells. The allele frequencies determined for each donor group before (Pre) and after (Post) xenotransplantation are shown for three independent donors. The percentages of the ~5-kb deletion are shown in yellow, and the indel distributions obtained at *HBG1* and *HBG2* are shown in different colors. The major indels at these sites are indicated, with each color representing an allele with a specific on-target indel. The light-green boxes collectively represent the edited alleles with low-frequency indels.

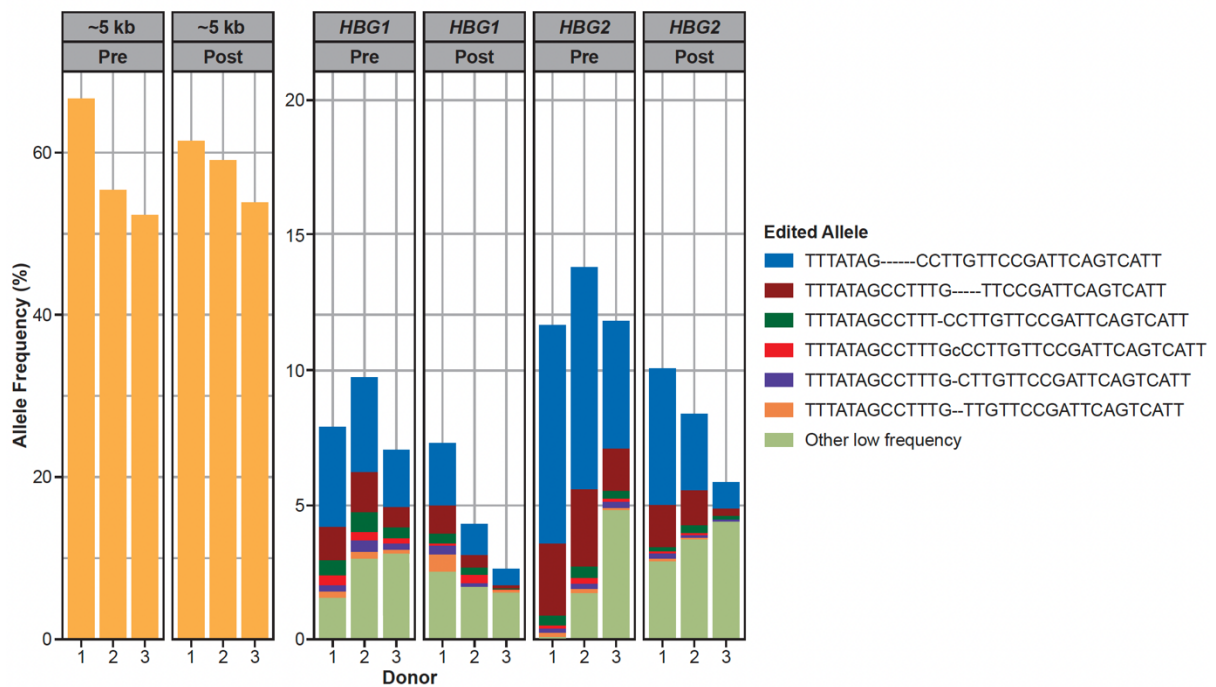

### Figure S5. Clonal dynamics in post-infusion samples from trial participants treated with OTQ923

The fractions of cells with the ~5-kb deletion and various indels were estimated in the cells collected from the three clinical trial participants at various time points. The bar graphs show the frequency of the ~5-kb deletion and the indel patterns at the *HBG1* and *HBG2* promoters in DNA isolated from peripheral blood nucleated cells from Participant 1 up to month 18 (A), from Participant 2 up to month 12 (B), and from Participant 3 up to month 6 (C). The percentages of the ~5-kb deletion are shown in yellow, and the indel distributions obtained at *HBG1* and *HBG2* are shown in different colors. The major indels at these sites are indicated, with each color representing an allele with a specific on-target indel. The light-green boxes collectively represent the edited alleles with low-frequency indels. Indels in the sorted neutrophils, T cells and B cells collected from the participants are shown in panel D. Orange bars represent the percentages of indels detected by next-generation sequencing (bright orange indicates indels at the *HBG1* locus, pale orange indicates indels at the *HBG2* locus). Blue bars represent the ~5-kb deletion that was detected in the infused product by quantitative PCR or by droplet digital PCR. Indel frequencies were consistent between BM cells (Figs. 2C, 2F and 2I) representative of the hematopoietic stem cells as well as sorted B-cells and myeloid cells/neutrophils in each participant (Shown below in supplemental Fig. 5D). Indel frequencies fluctuated in the T-cells during the first few months after infusion likely due to differential expansion of unedited T-cells and those derived from the edited HSCs after infusion.

A. Participant 1

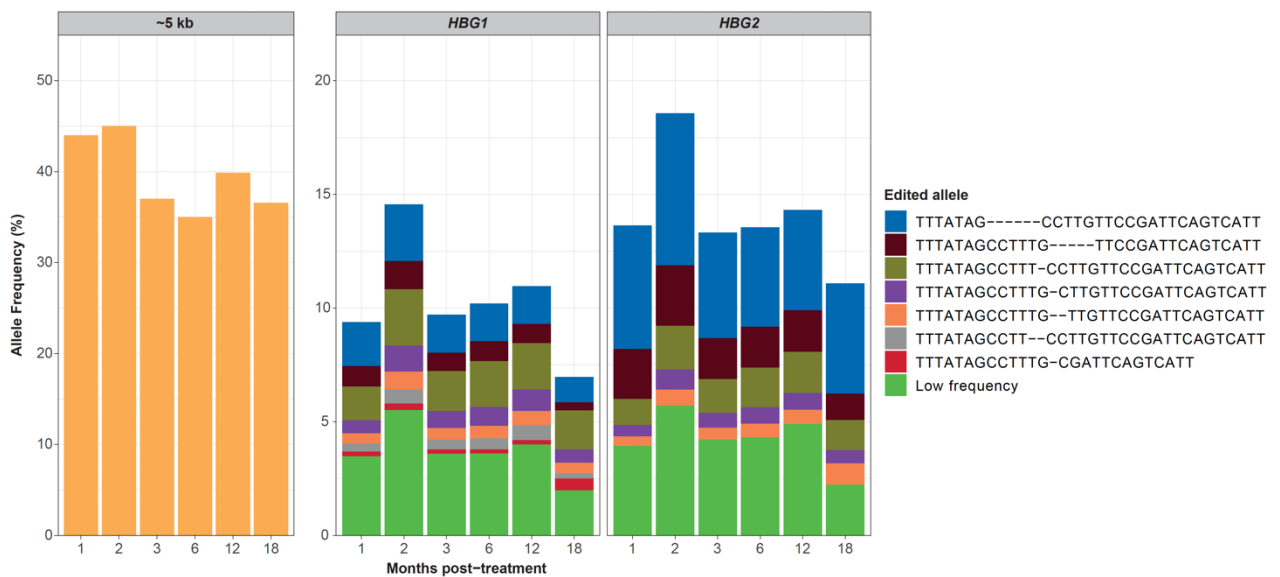

Figures continued on the next page

**B. Participant 2**

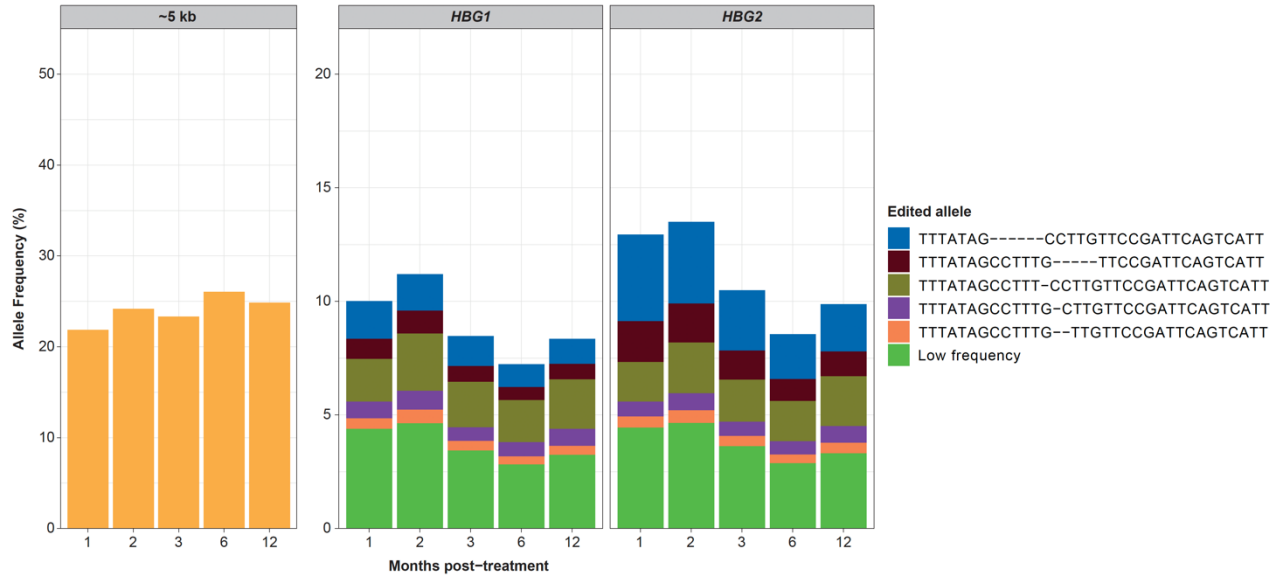

**C. Participant 3**

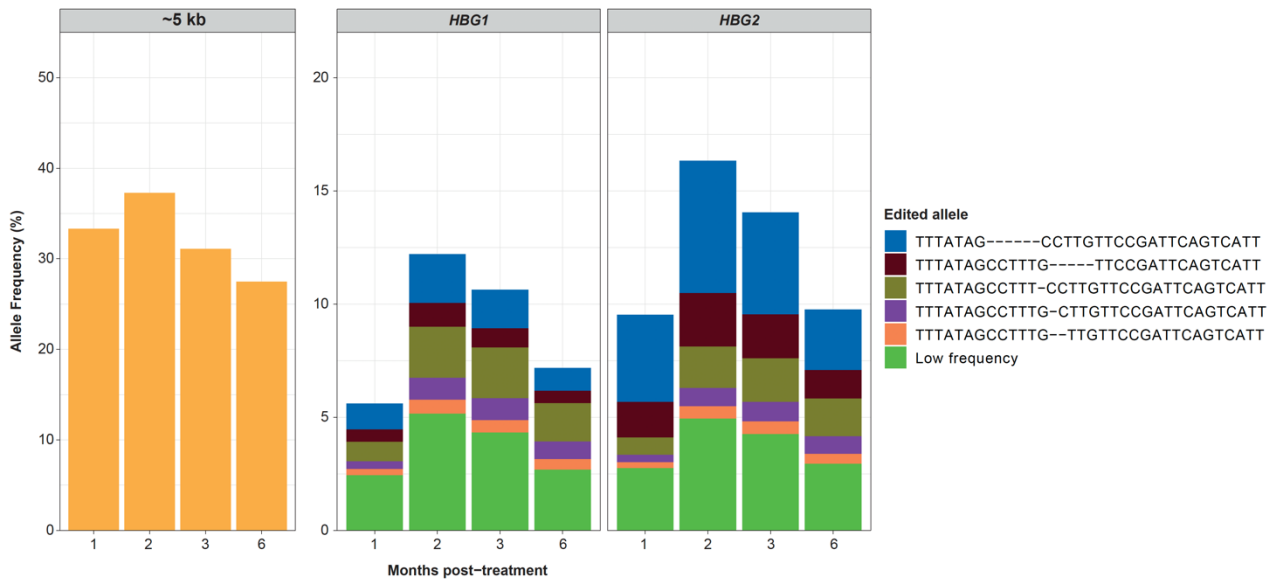

Figures continued on the next page

D. Indels in sorted neutrophils, T-cells, and B-cells.

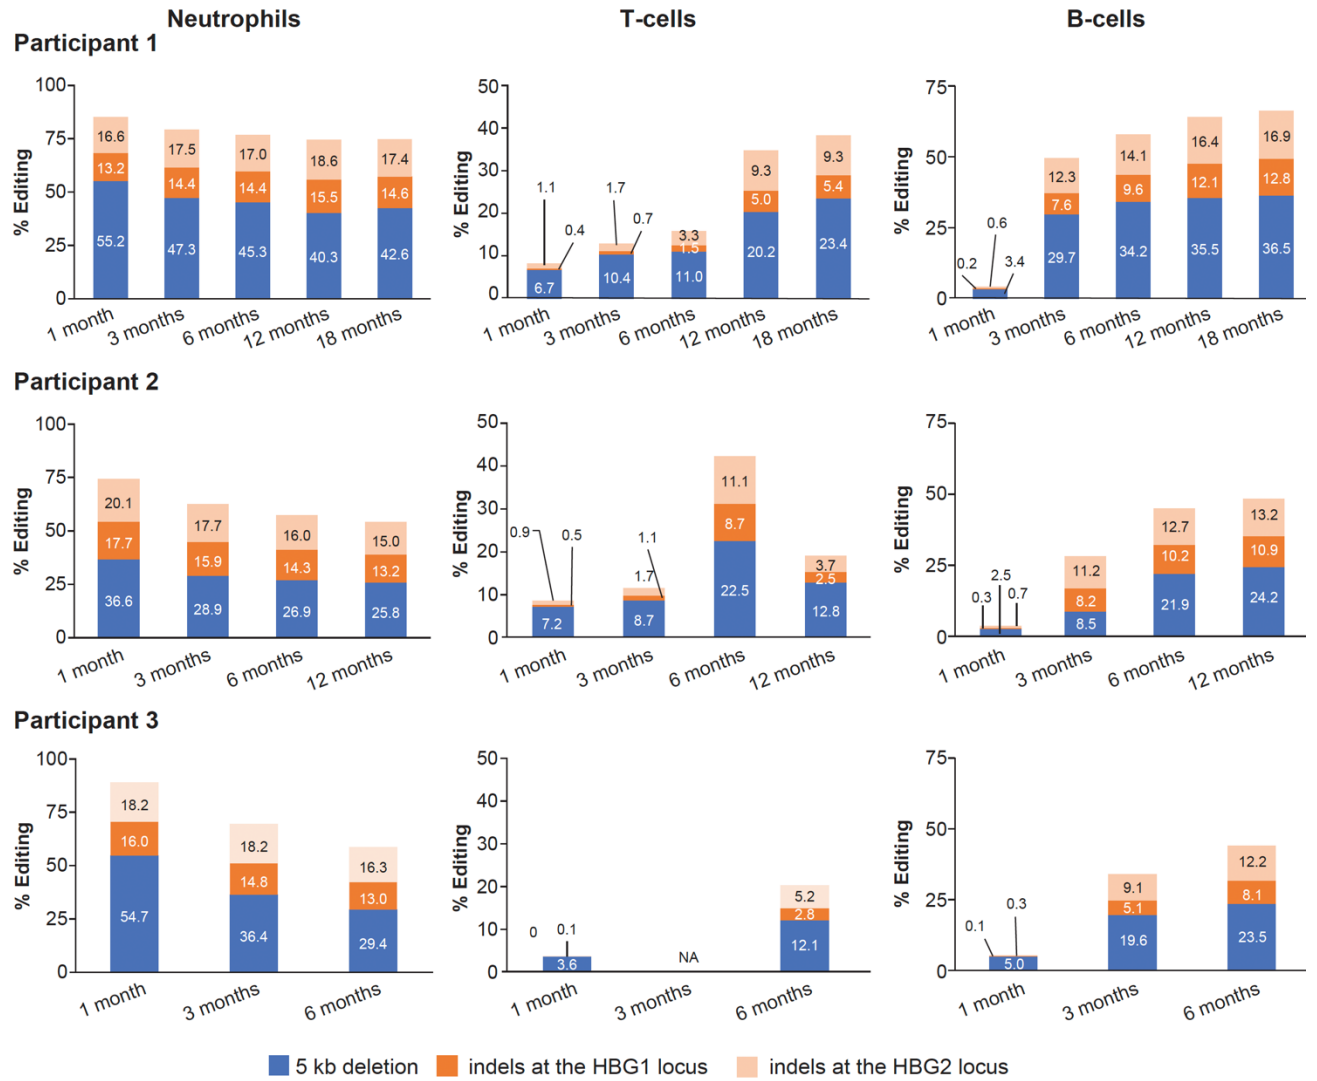

**Figure S6. Comparison of ddPCR and qPCR**

The correlation between the percentages of the ~5-kb deletion data generated using the ddPCR and qPCR techniques is shown in the plot below. The percentage of cells with the ~5-kb deletion in cryopreserved gRNA-68–edited CD34+ cells from healthy donors (n = 3) was determined using both the ddPCR and the qPCR techniques. The correlation between the percentages of cells with the ~5-kb deletions as calculated using ddPCR (x-axis) and qPCR (y-axis) revealed good agreement between the data, with a coefficient of determination (R<sup>2</sup>) of 0.9.

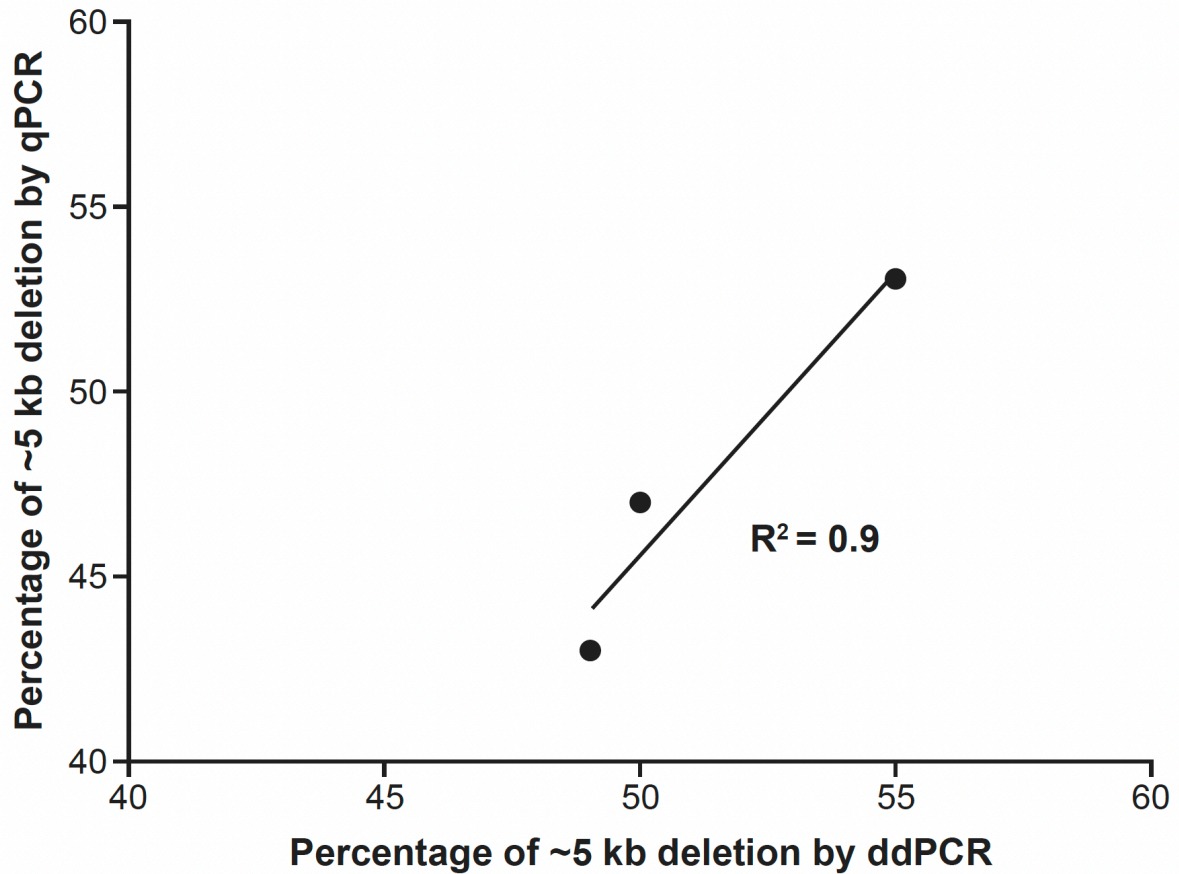

**Table S1. gRNA targeting domains directed to the *HBG1* and *HBG2* promoter regions on chromosome 11**

| Targeting Domain ID | Target Promoter Region | gRNA Targeting Domain Sequence | Genomic Location (hg38) 1 | Strand | Genomic Location (hg38) 2 (If present) | Strand |
|---------------------|------------------------|--------------------------------|---------------------------|--------|----------------------------------------|--------|
| 01                  | <i>HBG1</i>            | AGUCCUGGUAUC<br>CUCUAUGA       | chr11:5250170-<br>5250189 | -      |                                        |        |
| 02                  | <i>HBG1</i>            | AAUUAGCAGUAU<br>CCUCUUGG       | chr11:5250064-<br>5250083 | -      |                                        |        |
| 03                  | <i>HBG1</i>            | AGAAUAAAUUAG<br>AGAAAAAC       | chr11:5250124-<br>5250143 | -      |                                        |        |
| 04                  | <i>HBG1</i>            | AAAAAUUAGCAG<br>UAUCCUCU       | chr11:5250067-<br>5250086 | -      |                                        |        |
| 05                  | <i>HBG1</i>            | AAAAUUAGCAGU<br>AUCCUCUU       | chr11:5250066-<br>5250085 | -      |                                        |        |
| 06                  | <i>HBG1</i>            | AAAAACUGGAAU<br>GACUGAAU       | chr11:5250110-<br>5250129 | -      |                                        |        |
| 07                  | <i>HBG1</i>            | CUCCAUCAUAG<br>AGGAUACC        | chr11:5250164-<br>5250183 | +      |                                        |        |
| 08                  | <i>HBG1</i>            | GGAGAAGGAAAC<br>UAGCUAAA       | chr11:5250148-<br>5250167 | -      |                                        |        |
| 09                  | <i>HBG1</i>            | GUUUCCUUCUCC<br>CAUCAUAG       | chr11:5250156-<br>5250175 | +      |                                        |        |
| 10                  | <i>HBG1</i>            | GGGAGAAGGAAA<br>CUAGCUAA       | chr11:5250149-<br>5250168 | -      |                                        |        |
| 11                  | <i>HBG1</i>            | CACUGGAGCUAG<br>AGACAAGA       | chr11:5250214-<br>5250233 | -      |                                        |        |
| 12                  | <i>HBG1</i>            | AGAGACAAGAAG<br>GUAAAAAA       | chr11:5250204-<br>5250223 | -      |                                        |        |
| 13                  | <i>HBG1</i>            | AAAUUAGCAGUA<br>UCCUCUUG       | chr11:5250065-<br>5250084 | -      |                                        |        |
| 14                  | <i>HBG1</i>            | GUCCUGGUAUCC<br>UCUAUGAU       | chr11:5250169-<br>5250188 | -      |                                        |        |
| 15                  | <i>HBG1</i>            | GUAUCCUCUAUG<br>AUGGGAGA       | chr11:5250163-<br>5250182 | -      |                                        |        |
| 16                  | <i>HBG2</i>            | AUUAAGCAGCAG<br>UAUCCUCU       | chr11:5254991-<br>5255010 | -      |                                        |        |
| 17                  | <i>HBG2</i>            | AGAAUAAAUUAG<br>AGAAAAAU       | chr11:5255052-<br>5255071 | -      |                                        |        |
| 18                  | <i>HBG2</i>            | AGAAGUCCUGGU<br>AUCUUCUA       | chr11:5255101-<br>5255120 | -      |                                        |        |
| 19                  | <i>HBG2</i>            | UUAAGCAGCAGU<br>AUCCUCUU       | chr11:5254990-<br>5255009 | -      |                                        |        |
| 20                  | <i>HBG2</i>            | AAAAAUUGGAAU<br>GACUGAAU       | chr11:5255038-<br>5255057 | -      |                                        |        |
| 21                  | <i>HBG2</i>            | GGGAGAAGAAAA<br>CUAGCUAA       | chr11:5255077-<br>5255096 | -      |                                        |        |



|    |                       |                          |                           |   |                           |   |
|----|-----------------------|--------------------------|---------------------------|---|---------------------------|---|
| 22 | <i>HBG2</i>           | GGAGAAGAAAAC<br>UAGCUAAA | chr11:5255076-<br>5255095 | - |                           |   |
| 23 | <i>HBG2</i>           | CUCCACCAUAGA<br>AGAUACC  | chr11:5255092-<br>5255111 | + |                           |   |
| 24 | <i>HBG2</i>           | AGUCCUGGUAUC<br>UUCUAUGG | chr11:5255098-<br>5255117 | - |                           |   |
| 25 | <i>HBG2</i>           | GUCCUGGUAUCU<br>UCUAUGGU | chr11:5255097-<br>5255116 | - |                           |   |
| 26 | <i>HBG2</i>           | UAAGCAGCAGUA<br>UCCUCUUG | chr11:5254989-<br>5255008 | - |                           |   |
| 27 | <i>HBG2</i>           | AAGCAGCAGUAU<br>CCUCUUGG | chr11:5254988-<br>5255007 | - |                           |   |
| 28 | <i>HBG1/HB<br/>G2</i> | CCUAGCCAGCCGC<br>CGGCCCC | chr11:5249896-<br>5249915 | + | chr11:5254820-<br>5254839 | + |
| 29 | <i>HBG1/HB<br/>G2</i> | UAUCCAGUGAGG<br>CCAGGGGC | chr11:5249911-<br>5249930 | - | chr11:5254835-<br>5254854 | - |
| 30 | <i>HBG1/HB<br/>G2</i> | CAUUGAGAUAGU<br>GUGGGGAA | chr11:5250037-<br>5250056 | + | chr11:5254961-<br>5254980 | + |
| 31 | <i>HBG1/HB<br/>G2</i> | CCAGUGAGGCCA<br>GGGGCCGG | chr11:5249908-<br>5249927 | - | chr11:5254832-<br>5254851 | - |
| 32 | <i>HBG1/HB<br/>G2</i> | GUGGGGAAGGGG<br>CCCCAAG  | chr11:5250049-<br>5250068 | + | chr11:5254973-<br>5254992 | + |
| 33 | <i>HBG1/HB<br/>G2</i> | CCAGGGGCCGGC<br>GGCUGGCU | chr11:5249899-<br>5249918 | - | chr11:5254823-<br>5254842 | - |
| 34 | <i>HBG1/HB<br/>G2</i> | UGAGGCCAGGGG<br>CCGGCGGC | chr11:5249904-<br>5249923 | - | chr11:5254828-<br>5254847 | - |
| 35 | <i>HBG1/HB<br/>G2</i> | CAGUCCACACAC<br>UCGCUUC  | chr11:5249847-<br>5249866 | - | chr11:5254771-<br>5254790 | - |
| 36 | <i>HBG1/HB<br/>G2</i> | CCGCCGGCCCCUG<br>GCCUCAC | chr11:5249905-<br>5249924 | + | chr11:5254829-<br>5254848 | + |
| 37 | <i>HBG1/HB<br/>G2</i> | GUUUGCCUUGUC<br>AAGGCUAU | chr11:5249950-<br>5249969 | + | chr11:5254874-<br>5254893 | + |
| 38 | <i>HBG1/HB<br/>G2</i> | GGCUAGGGAUGA<br>AGAAUAAA | chr11:5249883-<br>5249902 | - | chr11:5254807-<br>5254826 | - |
| 39 | <i>HBG1/HB<br/>G2</i> | CAGGGGCCGGCG<br>GCUGGCUA | chr11:5249898-<br>5249917 | - | chr11:5254822-<br>5254841 | - |
| 40 | <i>HBG1/HB<br/>G2</i> | ACUGGAUACUCU<br>AAGACUAU | chr11:5249923-<br>5249942 | + | chr11:5254847-<br>5254866 | + |
| 41 | <i>HBG1/HB<br/>G2</i> | CCCUGGCUAAAC<br>UCCACCCA | chr11:5249996-<br>5250015 | - | chr11:5254920-<br>5254939 | - |
| 42 | <i>HBG1/HB<br/>G2</i> | UUAGAGUAUCCA<br>GUGAGGCC | chr11:5249917-<br>5249936 | - | chr11:5254841-<br>5254860 | - |
| 43 | <i>HBG1/HB<br/>G2</i> | CCCAUGGGUGGA<br>GUUUAGCC | chr11:5249992-<br>5250011 | + | chr11:5254916-<br>5254935 | + |
| 44 | <i>HBG1/HB<br/>G2</i> | AGGCAAGGCUGG<br>CCAACCCA | chr11:5249976-<br>5249995 | + | chr11:5254900-<br>5254919 | + |

|    |               |                          |                           |   |                           |   |
|----|---------------|--------------------------|---------------------------|---|---------------------------|---|
| 45 | HBG1/HB<br>G2 | UAGAGUAUCCAG<br>UGAGGCCA | chr11:5249916-<br>5249935 | - | chr11:5254840-<br>5254859 | - |
| 46 | HBG1/HB<br>G2 | UAUCUGUCUGAA<br>ACGGUCCC | chr11:5250013-<br>5250032 | - | chr11:5254937-<br>5254956 | - |
| 47 | HBG1/HB<br>G2 | AUUGAGAUAGUG<br>UGGGGAAG | chr11:5250038-<br>5250057 | + | chr11:5254962-<br>5254981 | + |
| 48 | HBG1/HB<br>G2 | CUUCAUCCCUAG<br>CCAGCCGC | chr11:5249889-<br>5249908 | + | chr11:5254813-<br>5254832 | + |
| 49 | HBG1/HB<br>G2 | GCUAUUGGUCAA<br>GGCAAGGC | chr11:5249965-<br>5249984 | + | chr11:5254889-<br>5254908 | + |
| 50 | HBG1/HB<br>G2 | AUGCAAUAUCU<br>GUCUGAAA  | chr11:5250020-<br>5250039 | - | chr11:5254944-<br>5254963 | - |
| 51 | HBG1/HB<br>G2 | GCAUUGAGAUAG<br>UGUGGGGA | chr11:5250036-<br>5250055 | + | chr11:5254960-<br>5254979 | + |
| 52 | HBG1/HB<br>G2 | UGGUCAAGUUUG<br>CCUUGUCA | chr11:5249943-<br>5249962 | + | chr11:5254867-<br>5254886 | + |
| 53 | HBG1/HB<br>G2 | GGCAAGGCUGGC<br>CAACCAU  | chr11:5249977-<br>5249996 | + | chr11:5254901-<br>5254920 | + |
| 54 | HBG1/HB<br>G2 | ACGGCUGACAAA<br>AGAAGUCC | chr11:5250185-<br>5250204 | - | chr11:5255113-<br>5255132 | - |
| 55 | HBG1/HB<br>G2 | CGAGUGUGUGGA<br>ACUGCUGA | chr11:5249851-<br>5249870 | + | chr11:5254775-<br>5254794 | + |
| 56 | HBG1/HB<br>G2 | CCUGGCUAAACU<br>CCACCAU  | chr11:5249995-<br>5250014 | - | chr11:5254919-<br>5254938 | - |
| 57 | HBG1/HB<br>G2 | CUUGUCAAGGCU<br>AUUGGUCA | chr11:5249956-<br>5249975 | + | chr11:5254880-<br>5254899 | + |
| 58 | HBG1/HB<br>G2 | AUAUUUGCAUUG<br>AGAUAGUG | chr11:5250030-<br>5250049 | + | chr11:5254954-<br>5254973 | + |
| 59 | HBG1/HB<br>G2 | GCUAAACUCCACC<br>CAUGGGU | chr11:5249991-<br>5250010 | - | chr11:5254915-<br>5254934 | - |
| 60 | HBG1/HB<br>G2 | ACGUUCCAGAAG<br>CGAGUGUG | chr11:5249839-<br>5249858 | + | chr11:5254763-<br>5254782 | + |
| 61 | HBG1/HB<br>G2 | UAUUUGCAUUGA<br>GAUAGUGU | chr11:5250031-<br>5250050 | + | chr11:5254955-<br>5254974 | + |
| 62 | HBG1/HB<br>G2 | GGAAUGACUGAA<br>UCGGAACA | chr11:5250103-<br>5250122 | - | chr11:5255031-<br>5255050 | - |
| 63 | HBG1/HB<br>G2 | CUUGACCAAUAG<br>CCUUGACA | chr11:5249958-<br>5249977 | - | chr11:5254882-<br>5254901 | - |
| 64 | HBG1/HB<br>G2 | CAAGGCUAUUGG<br>UCAAGGCA | chr11:5249961-<br>5249980 | + | chr11:5254885-<br>5254904 | + |
| 65 | HBG1/HB<br>G2 | AAGGCUGGCCAA<br>CCCAUGGG | chr11:5249980-<br>5249999 | + | chr11:5254904-<br>5254923 | + |
| 66 | HBG1/HB<br>G2 | ACUCGCUUCUGG<br>AACGUCUG | chr11:5249836-<br>5249855 | - | chr11:5254760-<br>5254779 | - |

|    |                  |                          |                           |   |                           |   |
|----|------------------|--------------------------|---------------------------|---|---------------------------|---|
| 67 | <i>HBG1/HBG2</i> | AUUUGCAUUGAG<br>AUAGUGUG | chr11:5250032-<br>5250051 | + | chr11:5254956-<br>5254975 | + |
| 68 | <i>HBG1/HBG2</i> | ACUGAAUCGGAA<br>CAAGGCAA | chr11:5250097-<br>5250116 | - | chr11:5255025-<br>5255044 | - |
| 69 | <i>HBG1/HBG2</i> | CCAUGGGUGGAG<br>UUUAGCCA | chr11:5249993-<br>5250012 | + | chr11:5254917-<br>5254936 | + |
| 70 | <i>HBG1/HBG2</i> | AGAGUAUCCAGU<br>GAGGCCAG | chr11:5249915-<br>5249934 | - | chr11:5254839-<br>5254858 | - |
| 71 | <i>HBG1/HBG2</i> | GAGUGUGUGGAA<br>CUGCUGAA | chr11:5249852-<br>5249871 | + | chr11:5254776-<br>5254795 | + |
| 72 | <i>HBG1/HBG2</i> | UAGUCUUAGAGU<br>AUCCAGUG | chr11:5249922-<br>5249941 | - | chr11:5254846-<br>5254865 | - |

Guides were designated as *HBG1* or *HBG2* selective based on 100% sequence homology within the targeted region. Coordinates are provided in the UCSC genome browser position format. The selected guides (gRNA-8, gRNA-10, and gRNA-22) were found to have a one-nucleotide mismatch relative to the gRNA targeting domain sequence within the homologous *HBG1* (gRNA-22) or *HBG2* target site (gRNA-8 and gRNA-10).

**Table S2. Busulfan administration**

| <b>Study Day</b>     | <b>Busulfan Total Daily Dose</b> | <b>Observed AUC</b> |
|----------------------|----------------------------------|---------------------|
| <b>Participant 1</b> |                                  |                     |
| Day -6               | 3.67 mg/kg                       | 16 mg*h/L           |
| Day -5               | 4.1 mg/kg                        | 20.6 mg*h/L         |
| Day -4               | 4.1 mg/kg                        | 22.1 mg*h/L         |
| Day -3               | 4.1 mg/kg                        | Not done            |
| <b>Participant 2</b> |                                  |                     |
| Day -6               | 2.86 mg/kg                       | 27.744 mg*h/L       |
| Day -5               | 2.55 mg/kg                       | 21.82 mg*h/L        |
| Day -4               | 2.55 mg/kg                       | 22.656 mg*h/L       |
| Day -3               | 2.55 mg/kg                       | Not done            |
| <b>Participant 3</b> |                                  |                     |
| Day -6               | 3.2 mg/kg                        | 14.48 mg*h/L        |
| Day -5               | 3.2 mg/kg                        | 14.48 mg*h/L        |
| Day -4               | 4.1 mg/kg                        | 23.16 mg*h/L        |
| Day -3               | 3.1 mg/kg                        | 17.38 mg*h/L        |

**Table S3. Off-target characterization of gRNA-68.**

| <b>Method</b>  | <b>Number of Sites Identified</b> | <b>Number of Sites Characterized</b> | <b>Confirmed Off-Targets</b> |
|----------------|-----------------------------------|--------------------------------------|------------------------------|
| Computational  | 163                               | 162 <sup>+</sup>                     | 0                            |
| Pan-Heme panel | 352 <sup>*</sup>                  | 352                                  | 0                            |
| SITE-Seq       | 156                               | 156 <sup>#</sup>                     | 0                            |

\*The number here refers to genes; <sup>+</sup>one 5-bp mismatch site was not characterized because of its repetitive nature. <sup>#</sup>Of these, 40 overlapped with the computationally derived sites. There were a total of 279 unique potential off-target sites.

**Table S4. Potential off-target sites identified by both computational and SITE-Seq analysis for gRNA-68**

|    | <b>Sequence coordinate</b> | <b>Annotation</b>          |
|----|----------------------------|----------------------------|
| 1  | chr1:33477303-33477322     | ZSCAN20 intron             |
| 2  | chr10:43645793-43645812    | ZNF32, ZNF32-AS3 intron    |
| 3  | chr10:89056619-89056638    | Intergenic                 |
| 4  | chr11:5250097-5250116      | Intergenic                 |
| 5  | chr11:5255025-5255044      | Intergenic                 |
| 6  | chr11:43428997-43429016    | TTC17 intron               |
| 7  | chr11:129789715-129789734  | Intergenic                 |
| 8  | chr12:190045-190064        | Intergenic                 |
| 9  | chr13:98183649-98183669    | FARP1 intron               |
| 10 | chr15:79413569-79413588    | TMED3 exon                 |
| 11 | chr17:10910316-10910335    | Intergenic                 |
| 12 | chr17:30901624-30901643    | TEFM intron                |
| 13 | chr17:50766891-50766910    | ANKRD40CL exon             |
| 14 | chr18:21605369-21605388    | Intergenic                 |
| 15 | chr18:41071436-41071455    | Intergenic                 |
| 16 | chr18:43588394-43588413    | Intergenic                 |
| 17 | chr18:75304356-75304375    | Intergenic                 |
| 18 | chr19:55429168-55429187    | SHISA7 exon                |
| 19 | chr2:7214577-7214596       | Intergenic                 |
| 20 | chr2:85300579-85300598     | TCF7L1 intron              |
| 21 | chr2:125044861-125044880   | Intergenic                 |
| 22 | chr2:151189575-151189594   | Intergenic                 |
| 23 | chr2:223639575-223639594   | Intergenic                 |
| 24 | chr20:32930693-32930712    | EFCAB8 intron              |
| 25 | chr22:17638029-17638046    | Intergenic                 |
| 26 | chr22:31839366-31839385    | DEPDC5 intron              |
| 27 | chr22:39514672-39514690    | MIEF1 exon                 |
| 28 | chr3:28154988-28155007     | Intergenic                 |
| 29 | chr3:134478687-134478706   | ANAPC13 exon               |
| 30 | chr3:153598641-153598660   | LINC02006 intron           |
| 31 | chr4:11272770-11272790     | Intergenic                 |
| 32 | chr4:52096951-52096970     | SPATA18 exon               |
| 33 | chr4:103647034-103647053   | TACR3 intron               |
| 34 | chr7:47656429-47656448     | C7orf65 intron             |
| 35 | chr7:64192351-64192370     | Intergenic                 |
| 36 | chr7:100214235-100214254   | STAG3 exon, CASTOR3 intron |
| 37 | chr9:20865997-20866016     | FOCAD intron               |
| 38 | chr9:129933497-129933516   | FNBP1 intron               |
| 39 | chrX:104749978-104749997   | IL1RAPL2 intron            |
| 40 | chrX:147537296-147537315   | Intergenic                 |

**Table S5. Genes targeted by the Pan-Heme v1.0 panel**

| <b>RefSeq Gene Identifiers</b> | <b>Gene Coordinates (Human Genome Build hg19)</b> | <b># Hybrid Capture Baits</b> | <b>Size of Targeted Region (bp)</b> | <b>Databases Used to Determine Coordinates</b> | <b>Bait Coverage of the Intended Targeted Regions</b> |
|--------------------------------|---------------------------------------------------|-------------------------------|-------------------------------------|------------------------------------------------|-------------------------------------------------------|
| <i>ABCG1</i>                   | chr21:43621776-43720724                           | 22                            | 3420                                | Gencode, RefSeq, VEGA                          | 98.450294                                             |
| <i>ABL1</i>                    | chr9:133589697-133761080                          | 14                            | 3964                                | Gencode, RefSeq, VEGA                          | 100                                                   |
| <i>ACSL6</i>                   | chr5:131283298-131347623                          | 25                            | 2847                                | Gencode, RefSeq, VEGA                          | 100                                                   |
| <i>ADAMTSL3</i>                | chr15:84324504-84706568                           | 29                            | 5656                                | Gencode, RefSeq, VEGA                          | 100                                                   |
| <i>ADARB2</i>                  | chr10:1229123-1779354                             | 10                            | 2629                                | Gencode, RefSeq, VEGA                          | 100                                                   |
| <i>AKAP8</i>                   | chr19:15465716-15490552                           | 14                            | 2400                                | Gencode, RefSeq                                | 100                                                   |
| <i>AKT1</i>                    | chr14:105236668-105258990                         | 13                            | 1703                                | Gencode, RefSeq                                | 100                                                   |
| <i>ALPK2</i>                   | chr18:56149045-56279039                           | 12                            | 6753                                | Gencode, RefSeq, VEGA                          | 100                                                   |
| <i>ANKLE2</i>                  | chr12:133303818-133338394                         | 14                            | 3153                                | Gencode, RefSeq                                | 100                                                   |
| <i>ANO1</i>                    | chr11:69924703-70034120                           | 29                            | 3910                                | Gencode, RefSeq                                | 100                                                   |
| <i>APC</i>                     | chr5:112043405-112198243                          | 19                            | 9166                                | Gencode, RefSeq, VEGA                          | 99.454506                                             |
| <i>ARFRP1</i>                  | chr20:62331785-62338453                           | 9                             | 1139                                | Gencode, RefSeq, VEGA                          | 100                                                   |
| <i>ARHGEF12</i>                | chr11:120207943-120355796                         | 41                            | 5455                                | Gencode, RefSeq                                | 100                                                   |
| <i>ARID1A</i>                  | chr1:27022885-27107257                            | 20                            | 7260                                | Gencode, RefSeq, VEGA                          | 99.476585                                             |
| <i>ASMTL</i>                   | chrY:1472152-1521743                              | 13                            | 2126                                | Gencode, RefSeq                                | 100                                                   |
| <i>ASMTL</i>                   | chrX:1522152-1571743                              | 13                            | 2126                                | Gencode, RefSeq, VEGA                          | 100                                                   |

|               |                           |    |       |                       |          |
|---------------|---------------------------|----|-------|-----------------------|----------|
| <i>ASXL1</i>  | chr20:30946569-31025151   | 17 | 5054  | Gencode, RefSeq, VEGA | 99.48556 |
| <i>ATM</i>    | chr11:108098342-108236245 | 62 | 10411 | Gencode, RefSeq       | 100      |
| <i>ATR</i>    | chr3:142168261-142297556  | 49 | 9120  | Gencode, RefSeq, VEGA | 99.08991 |
| <i>ATRX</i>   | chrX:76763819-77041497    | 37 | 8299  | Gencode, RefSeq, VEGA | 100      |
| <i>AURKA</i>  | chr20:54945204-54963263   | 8  | 1387  | Gencode, RefSeq, VEGA | 100      |
| <i>AXIN1</i>  | chr16:338112-397035       | 10 | 2847  | Gencode, RefSeq, VEGA | 100      |
| <i>B2M</i>    | chr15:45003735-45008550   | 3  | 443   | Gencode, RefSeq, VEGA | 100      |
| <i>B3GAT1</i> | chr11:134251822-134257751 | 5  | 1144  | Gencode, RefSeq       | 100      |
| <i>BAP1</i>   | chr3:52436294-52443904    | 17 | 2599  | Gencode, RefSeq, VEGA | 100      |
| <i>BCL2</i>   | chr18:60795848-60985909   | 2  | 793   | Gencode, RefSeq, VEGA | 100      |
| <i>BCL2L2</i> | chr14:23776967-23778184   | 2  | 622   | Gencode, RefSeq, VEGA | 100      |
| <i>BCOR</i>   | chrX:39909159-39937192    | 16 | 5707  | Gencode, RefSeq, VEGA | 100      |
| <i>BIRC2</i>  | chr11:102220576-102248924 | 8  | 2032  | Gencode, RefSeq       | 100      |
| <i>BIRC3</i>  | chr11:102195231-102207843 | 8  | 1975  | Gencode, RefSeq       | 100      |
| <i>BIRC7</i>  | chr20:61867439-61870967   | 6  | 1205  | Gencode, RefSeq, VEGA | 100      |
| <i>BRAF</i>   | chr7:140426284-140624513  | 21 | 2799  | Gencode, RefSeq, VEGA | 100      |
| <i>BRCA1</i>  | chr17:41197685-41276123   | 24 | 6184  | Gencode, RefSeq, VEGA | 98.93273 |
| <i>BRCA2</i>  | chr13:32890588-32972917   | 26 | 10777 | Gencode, RefSeq, VEGA | 100      |
| <i>BTG1</i>   | chr12:92537846-92539321   | 2  | 556   | Gencode, RefSeq       | 100      |



|                 |                           |    |      |                       |           |
|-----------------|---------------------------|----|------|-----------------------|-----------|
| <i>BTK</i>      | chrX:100604863-100630282  | 19 | 2366 | Gencode, RefSeq, VEGA | 100       |
| <i>C12ORF35</i> | chr12:32133880-32145479   | 3  | 5304 | Gencode, VEGA         | 100       |
| <i>CAMK4</i>    | chr5:110560172-110820174  | 11 | 1642 | Gencode, RefSeq, VEGA | 100       |
| <i>CARD11</i>   | chr7:2946262-2998150      | 24 | 3945 | Gencode, RefSeq, VEGA | 100       |
| <i>CARS</i>     | chr11:3022334-3078607     | 24 | 3095 | Gencode, RefSeq, VEGA | 100       |
| <i>CBL</i>      | chr11:119077118-119170501 | 16 | 3041 | Gencode, RefSeq       | 100       |
| <i>CCND1</i>    | chr11:69456072-69466060   | 5  | 988  | Gencode, RefSeq       | 100       |
| <i>CCND3</i>    | chr6:41903579-41909397    | 6  | 1151 | Gencode, RefSeq, VEGA | 100       |
| <i>CD36</i>     | chr7:80276047-80303473    | 12 | 1659 | Gencode, RefSeq, VEGA | 100       |
| <i>CDH5</i>     | chr16:66413231-66437082   | 11 | 2575 | Gencode, RefSeq, VEGA | 100       |
| <i>CDKN2A</i>   | chr9:21968218-21994463    | 5  | 1135 | Gencode, RefSeq, VEGA | 100       |
| <i>CEBPA</i>    | chr19:33792234-33793330   | 1  | 1097 | Gencode, RefSeq, VEGA | 100       |
| <i>CIT</i>      | chr12:120126027-120313982 | 49 | 7238 | Gencode, RefSeq, VEGA | 100       |
| <i>CREBBP</i>   | chr16:3777709-3930131     | 31 | 8153 | Gencode, RefSeq, VEGA | 98.94517  |
| <i>CRLF2</i>    | chrX:1314877-1331537      | 7  | 1133 | Gencode, RefSeq, VEGA | 78.905556 |
| <i>CRLF2</i>    | chrY:1264877-1281537      | 7  | 1133 | Gencode, RefSeq       | 78.905556 |
| <i>CSF1</i>     | chr1:110453636-110467821  | 8  | 1825 | Gencode, RefSeq, VEGA | 96.76712  |
| <i>CSF1R</i>    | chr5:149433622-149466000  | 22 | 3449 | Gencode, RefSeq, VEGA | 100       |
| <i>CSNK1A1</i>  | chr5:148876406-148930537  | 13 | 1410 | Gencode, RefSeq, VEGA | 100       |
| <i>CTCF</i>     | chr16:67644726-67671785   | 10 | 2384 | Gencode, RefSeq, VEGA | 100       |
| <i>CTNNB1</i>   | chr3:41265550-41280843    | 14 | 2626 | Gencode, RefSeq, VEGA | 100       |

|                |                           |    |       |                       |           |
|----------------|---------------------------|----|-------|-----------------------|-----------|
| <i>CUL4A</i>   | chr13:113863932-113917906 | 20 | 2704  | Gencode, RefSeq, VEGA | 100       |
| <i>CUX1</i>    | chr7:101459301-101926392  | 34 | 6043  | Gencode, RefSeq, VEGA | 100       |
| <i>CYLD</i>    | chr16:50783600-50830429   | 18 | 3245  | Gencode, RefSeq       | 100       |
| <i>DAPK1</i>   | chr9:90113983-90322289    | 26 | 4888  | Gencode, RefSeq, VEGA | 100       |
| <i>DCHS1</i>   | chr11:6642714-6662854     | 20 | 10583 | Gencode, RefSeq, VEGA | 100       |
| <i>DNM2</i>    | chr19:10824133-10941733   | 24 | 3750  | Gencode, RefSeq       | 100       |
| <i>DNMT3A</i>  | chr2:25457138-25536863    | 25 | 3388  | Gencode, RefSeq, VEGA | 100       |
| <i>DPYD</i>    | chr1:97544522-98386488    | 25 | 3716  | Gencode, RefSeq, VEGA | 100       |
| <i>DSC3</i>    | chr18:28574131-28622636   | 17 | 3058  | Gencode, RefSeq       | 100       |
| <i>DUSP2</i>   | chr2:96809552-96811103    | 4  | 1025  | Gencode, RefSeq, VEGA | 100       |
| <i>DUSP27</i>  | chr1:167064077-167097855  | 5  | 3577  | Gencode, RefSeq, VEGA | 100       |
| <i>EIF2AK2</i> | chr2:37334406-37374959    | 16 | 1997  | Gencode, RefSeq, VEGA | 97.946915 |
| <i>ELN</i>     | chr7:73442508-73483040    | 35 | 3177  | Gencode, RefSeq, VEGA | 100       |
| <i>EP300</i>   | chr22:41488999-41574970   | 31 | 7865  | Gencode, RefSeq, VEGA | 100       |
| <i>EPHA3</i>   | chr3:89156889-89528662    | 17 | 3318  | Gencode, RefSeq, VEGA | 100       |
| <i>EPHA7</i>   | chr6:93953134-94129069    | 17 | 3345  | Gencode, RefSeq, VEGA | 100       |
| <i>EPHB3</i>   | chr3:184280014-184299420  | 16 | 3317  | Gencode, RefSeq, VEGA | 100       |
| <i>ERBB2</i>   | chr17:37855803-37884307   | 28 | 4360  | Gencode, RefSeq       | 100       |
| <i>ETV1</i>    | chr7:13935481-14028687    | 15 | 1951  | Gencode, RefSeq, VEGA | 100       |
| <i>ETV4</i>    | chr17:41605877-41622995   | 12 | 1695  | Gencode, RefSeq       | 100       |
| <i>ETV6</i>    | chr12:11803052-12043990   | 8  | 1519  | Gencode, RefSeq       | 100       |
| <i>EZH2</i>    | chr7:148504728-148544400  | 21 | 2876  | Gencode, RefSeq, VEGA | 100       |

|                |                          |    |      |                       |          |
|----------------|--------------------------|----|------|-----------------------|----------|
| <i>FAF1</i>    | chr1:50907102-51425493   | 21 | 2415 | Gencode, RefSeq, VEGA | 100      |
| <i>FANCC</i>   | chr9:97863979-98011583   | 15 | 2127 | Gencode, RefSeq, VEGA | 100      |
| <i>FBXO31</i>  | chr16:87364884-87417360  | 9  | 1800 | Gencode, RefSeq       | 100      |
| <i>FBXW7</i>   | chr4:153244023-153332965 | 14 | 2898 | Gencode, RefSeq       | 100      |
| <i>FGF19</i>   | chr11:69514020-69518654  | 3  | 711  | Gencode, RefSeq       | 100      |
| <i>FGF4</i>    | chr11:69588067-69589862  | 3  | 681  | Gencode, RefSeq       | 100      |
| <i>FGFR1OP</i> | chr6:167412891-167453658 | 14 | 1593 | Gencode, RefSeq, VEGA | 100      |
| <i>FGFR3</i>   | chr4:1795652-1809424     | 18 | 3360 | Gencode, RefSeq, VEGA | 100      |
| <i>FLT1</i>    | chr13:28877294-29068990  | 34 | 5019 | Gencode, RefSeq, VEGA | 97.88802 |
| <i>FLT3</i>    | chr13:28578179-28674657  | 25 | 3504 | Gencode, RefSeq, VEGA | 100      |
| <i>FLYWCH1</i> | chr16:2979677-2998738    | 11 | 2871 | Gencode, RefSeq       | 100      |
| <i>GATA1</i>   | chrX:48649507-48652685   | 5  | 1446 | Gencode, RefSeq, VEGA | 100      |
| <i>GATA2</i>   | chr3:128199852-128205884 | 5  | 1543 | Gencode, RefSeq, VEGA | 100      |
| <i>GNA13</i>   | chr17:63010365-63052721  | 4  | 1214 | Gencode, RefSeq       | 100      |
| <i>GRK7</i>    | chr3:141497117-141535902 | 4  | 1742 | Gencode, RefSeq, VEGA | 100      |
| <i>H3F3A</i>   | chr1:226252043-226259190 | 3  | 561  | Gencode, RefSeq, VEGA | 100      |
| <i>HMGA1</i>   | chr6:34208548-34213402   | 4  | 1135 | Gencode, RefSeq, VEGA | 100      |
| <i>HNF1B</i>   | chr17:36047273-36104885  | 9  | 1947 | Gencode, RefSeq, VEGA | 100      |
| <i>HOXA3</i>   | chr7:27147524-27150269   | 2  | 1372 | Gencode, RefSeq, VEGA | 100      |
| <i>HOXA9</i>   | chr7:27203212-27219284   | 4  | 1266 | Gencode, RefSeq, VEGA | 100      |
| <i>HRAS</i>    | chr11:532626-534332      | 5  | 733  | Gencode, RefSeq, VEGA | 100      |
| <i>ICK</i>     | chr6:52869937-52906044   | 13 | 2159 | Gencode, RefSeq, VEGA | 100      |

|               |                          |    |      |                       |           |
|---------------|--------------------------|----|------|-----------------------|-----------|
| <i>ID3</i>    | chr1:23885441-23885927   | 2  | 400  | Gencode, RefSeq, VEGA | 100       |
| <i>IDH1</i>   | chr2:209101793-209116285 | 8  | 1408 | Gencode, RefSeq, VEGA | 100       |
| <i>IDH2</i>   | chr15:90627488-90645632  | 11 | 1579 | Gencode, RefSeq, VEGA | 100       |
| <i>IGF2</i>   | chr11:2154207-2161536    | 4  | 800  | Gencode, RefSeq, VEGA | 100       |
| <i>IGFBP3</i> | chr7:45954409-45961308   | 5  | 1197 | Gencode, RefSeq, VEGA | 100       |
| <i>IKZF1</i>  | chr7:50358648-50468335   | 8  | 2085 | Gencode, RefSeq, VEGA | 100       |
| <i>IKZF3</i>  | chr17:37922033-38020389  | 8  | 1690 | Gencode, RefSeq, VEGA | 100       |
| <i>IL7R</i>   | chr5:35857070-35876598   | 8  | 1716 | Gencode, RefSeq, VEGA | 100       |
| <i>IMP4</i>   | chr2:131100496-131104051 | 10 | 1167 | Gencode, RefSeq, VEGA | 100       |
| <i>IRAK1</i>  | chrX:153276381-153285273 | 14 | 2825 | Gencode, RefSeq, VEGA | 100       |
| <i>IRF8</i>   | chr16:85936612-85954898  | 8  | 1441 | Gencode, RefSeq, VEGA | 100       |
| <i>JAK1</i>   | chr1:65300235-65351957   | 24 | 3945 | Gencode, RefSeq, VEGA | 100       |
| <i>JAK2</i>   | chr9:5021978-5126801     | 23 | 3859 | Gencode, RefSeq, VEGA | 100       |
| <i>JAK3</i>   | chr19:17937542-17955236  | 23 | 3987 | Gencode, RefSeq       | 100       |
| <i>KDM4C</i>  | chr9:6720939-7174739     | 25 | 4032 | Gencode, RefSeq, VEGA | 96.37897  |
| <i>KDM5A</i>  | chr12:394612-498267      | 29 | 5698 | Gencode, RefSeq       | 100       |
| <i>KDM6A</i>  | chrX:44732788-44970666   | 31 | 5090 | Gencode, RefSeq, VEGA | 100       |
| <i>KIT</i>    | chr4:55524172-55604733   | 22 | 3379 | Gencode, RefSeq, VEGA | 100       |
| <i>KLF2</i>   | chr19:16435725-16437852  | 3  | 1128 | Gencode, RefSeq       | 99.645386 |
| <i>KRAS</i>   | chr12:25362719-25398328  | 5  | 787  | Gencode, RefSeq       | 100       |
| <i>LMO1</i>   | chr11:8246153-8290005    | 5  | 593  | Gencode, RefSeq       | 100       |
| <i>LRRK2</i>  | chr12:40618924-40761577  | 52 | 8746 | Gencode, RefSeq, VEGA | 100       |

|               |                           |    |       |                       |           |
|---------------|---------------------------|----|-------|-----------------------|-----------|
| <i>MAGEC3</i> | chrX:140926092-140985628  | 8  | 2705  | Gencode, RefSeq, VEGA | 100       |
| <i>MALT1</i>  | chr18:56338866-56415084   | 17 | 2815  | Gencode, RefSeq, VEGA | 100       |
| <i>MAP3K4</i> | chr6:161412954-161551927  | 29 | 5469  | Gencode, RefSeq, VEGA | 100       |
| <i>MATK</i>   | chr19:3778171-3789355     | 14 | 1879  | Gencode, RefSeq       | 100       |
| <i>MED12</i>  | chrX:70338595-70362078    | 45 | 7498  | Gencode, RefSeq, VEGA | 99.54655  |
| <i>MED12L</i> | chr3:150804704-151150602  | 45 | 7494  | Gencode, RefSeq, VEGA | 100       |
| <i>MEF2B</i>  | chr19:19256493-19267955   | 9  | 1565  | Gencode, RefSeq, VEGA | 91.5655   |
| <i>MLL2</i>   | chr12:49415553-49449117   | 54 | 17694 | Gencode               | 99.72872  |
| <i>MLL3</i>   | chr7:151833907-152132881  | 62 | 16276 | Gencode, VEGA         | 99.637505 |
| <i>MLL4</i>   | chr6:168227803-168370625  | 36 | 6563  | Gencode, RefSeq, VEGA | 100       |
| <i>MPL</i>    | chr1:43803510-43818453    | 12 | 2233  | Gencode, RefSeq, VEGA | 100       |
| <i>MSH2</i>   | chr2:47630321-47739583    | 18 | 3344  | Gencode, RefSeq, VEGA | 97.996414 |
| <i>MSH6</i>   | chr2:48010363-48034009    | 10 | 4318  | Gencode, RefSeq, VEGA | 100       |
| <i>MTMR8</i>  | chrX:63444205-63615253    | 17 | 3457  | Gencode, RefSeq, VEGA | 98.813995 |
| <i>MUC4</i>   | chr3:195474037-195538698  | 26 | 16784 | Gencode, RefSeq, VEGA | 100       |
| <i>MYC</i>    | chr8:128748830-128753214  | 3  | 1425  | Gencode, RefSeq, VEGA | 100       |
| <i>MYD88</i>  | chr3:38180143-38182787    | 5  | 1054  | Gencode, RefSeq, VEGA | 100       |
| <i>MYO3B</i>  | chr2:171034788-171509641  | 38 | 4987  | Gencode, RefSeq, VEGA | 97.152596 |
| <i>MYOM2</i>  | chr8:1998871-2092915      | 36 | 5118  | Gencode, RefSeq, VEGA | 100       |
| <i>NCOR2</i>  | chr12:124809938-124979807 | 50 | 8713  | Gencode, RefSeq, VEGA | 100       |
| <i>NEK8</i>   | chr17:27055822-27069015   | 14 | 2519  | Gencode, RefSeq       | 100       |

|               |                          |    |      |                       |          |
|---------------|--------------------------|----|------|-----------------------|----------|
| <i>NF1</i>    | chr17:29422318-29705959  | 60 | 9902 | Gencode, RefSeq, VEGA | 100      |
| <i>NF2</i>    | chr22:29999978-30090808  | 17 | 2221 | Gencode, RefSeq, VEGA | 100      |
| <i>NOTCH1</i> | chr9:139390513-139440248 | 34 | 8348 | Gencode, RefSeq, VEGA | 100      |
| <i>NOTCH2</i> | chr1:120457919-120612085 | 38 | 9195 | Gencode, RefSeq, VEGA | 100      |
| <i>NPM1</i>   | chr5:170814943-170837579 | 12 | 1134 | Gencode, RefSeq, VEGA | 93.1217  |
| <i>NR3C1</i>  | chr5:142658919-142780414 | 9  | 2576 | Gencode, RefSeq, VEGA | 100      |
| <i>NRAS</i>   | chr1:115251146-115258791 | 4  | 650  | Gencode, RefSeq, VEGA | 100      |
| <i>NTRK1</i>  | chr1:156785612-156851444 | 19 | 2902 | Gencode, RefSeq, VEGA | 100      |
| <i>PARP1</i>  | chr1:224102731-226595640 | 25 | 3828 | Gencode, RefSeq, VEGA | 96.31661 |
| <i>PAX5</i>   | chr9:36840516-37034038   | 11 | 1484 | Gencode, RefSeq, VEGA | 100      |
| <i>PCDH15</i> | chr10:55566329-56424032  | 45 | 8504 | Gencode, RefSeq, VEGA | 98.97695 |
| <i>PDGFRA</i> | chr4:55106210-55161449   | 24 | 3930 | Gencode, RefSeq, VEGA | 97.88804 |
| <i>PDGFRB</i> | chr5:149495316-149516620 | 22 | 3795 | Gencode, RefSeq, VEGA | 100      |
| <i>PDPK1</i>  | chr16:2587990-2647778    | 14 | 2069 | Gencode, RefSeq, VEGA | 100      |
| <i>PHF6</i>   | chrX:133511638-133559370 | 9  | 1387 | Gencode, RefSeq, VEGA | 100      |
| <i>PHLPP2</i> | chr16:71674793-71748708  | 20 | 4571 | Gencode, RefSeq       | 100      |
| <i>PIK3CA</i> | chr3:178916604-178952162 | 20 | 3609 | Gencode, RefSeq, VEGA | 100      |
| <i>PIM1</i>   | chr6:37138069-37141877   | 6  | 1335 | Gencode, RefSeq, VEGA | 100      |
| <i>PKN2</i>   | chr1:89150254-89299141   | 24 | 3593 | Gencode, RefSeq, VEGA | 100      |
| <i>PMS1</i>   | chr2:190656526-190742172 | 16 | 3397 | Gencode, RefSeq, VEGA | 97.05623 |

|               |                           |    |       |                       |          |
|---------------|---------------------------|----|-------|-----------------------|----------|
| <i>POLD1</i>  | chr19:50902096-50921214   | 26 | 3847  | Gencode, RefSeq       | 100      |
| <i>PRDM1</i>  | chr6:106534419-106555371  | 9  | 2715  | Gencode, RefSeq, VEGA | 100      |
| <i>PRDM16</i> | chr1:2985814-3350385      | 19 | 4238  | Gencode, RefSeq, VEGA | 99.45729 |
| <i>PRDM9</i>  | chr5:23509133-23527892    | 10 | 2885  | Gencode, RefSeq, VEGA | 100      |
| <i>PRKACG</i> | chr9:71627943-71629018    | 1  | 1076  | Gencode, RefSeq, VEGA | 100      |
| <i>PRKCZ</i>  | chr1:1982060-2116458      | 21 | 2392  | Gencode, RefSeq, VEGA | 100      |
| <i>PROZ</i>   | chr13:113812965-113826429 | 9  | 1449  | Gencode, RefSeq, VEGA | 100      |
| <i>PTEN</i>   | chr10:89624217-89725239   | 9  | 1392  | Gencode, RefSeq, VEGA | 100      |
| <i>PTPN11</i> | chr12:112856906-112942578 | 16 | 2112  | Gencode, RefSeq, VEGA | 100      |
| <i>PTPRD</i>  | chr9:8317864-8733853      | 42 | 6775  | Gencode, RefSeq, VEGA | 100      |
| <i>RB1</i>    | chr13:48878039-49054217   | 27 | 3327  | Gencode, RefSeq, VEGA | 100      |
| <i>RBM15</i>  | chr1:110882018-110888986  | 3  | 3041  | Gencode, RefSeq, VEGA | 100      |
| <i>RET</i>    | chr10:43572697-43623727   | 20 | 3777  | Gencode, RefSeq, VEGA | 100      |
| <i>RNF213</i> | chr17:78237471-78367308   | 69 | 17473 | Gencode, RefSeq, VEGA | 100      |
| <i>ROCK2</i>  | chr2:11323553-11484272    | 33 | 4836  | Gencode, RefSeq, VEGA | 100      |
| <i>RPS2</i>   | chr16:2012089-2014636     | 6  | 1002  | Gencode, RefSeq, VEGA | 100      |
| <i>RPTOR</i>  | chr17:78519420-78938140   | 34 | 4724  | Gencode, RefSeq       | 100      |
| <i>RSPO4</i>  | chr20:940990-982817       | 5  | 805   | Gencode, RefSeq, VEGA | 100      |
| <i>RUNX1</i>  | chr21:36164266-36421206   | 12 | 1922  | Gencode, RefSeq, VEGA | 100      |
| <i>SDHA</i>   | chr5:218461-256545        | 16 | 2449  | Gencode, RefSeq, VEGA | 100      |
| <i>SETBP1</i> | chr18:42281302-42643673   | 6  | 5100  | Gencode, RefSeq, VEGA | 100      |

|                |                           |    |      |                       |          |
|----------------|---------------------------|----|------|-----------------------|----------|
| <i>SF3B1</i>   | chr2:198257017-198299733  | 27 | 4585 | Gencode, RefSeq, VEGA | 100      |
| <i>SGK1</i>    | chr6:134491396-134638608  | 17 | 2498 | Gencode, RefSeq, VEGA | 100      |
| <i>SH2B3</i>   | chr12:111855940-111886116 | 8  | 2014 | Gencode, RefSeq       | 100      |
| <i>SLC19A1</i> | chr21:46916239-46957883   | 9  | 2514 | Gencode, RefSeq, VEGA | 100      |
| <i>SLC1A2</i>  | chr11:35282431-35441497   | 12 | 1970 | Gencode, RefSeq, VEGA | 100      |
| <i>SMAD2</i>   | chr18:45368188-45423137   | 10 | 1604 | Gencode, RefSeq, VEGA | 100      |
| <i>SMAD4</i>   | chr18:48573407-48604847   | 13 | 1999 | Gencode, RefSeq, VEGA | 100      |
| <i>SMARCB1</i> | chr22:24129347-24176377   | 9  | 1392 | Gencode, RefSeq, VEGA | 100      |
| <i>SMO</i>     | chr7:128828983-128852302  | 13 | 2647 | Gencode, RefSeq, VEGA | 100      |
| <i>SNTG2</i>   | chr2:946673-1371256       | 18 | 2018 | Gencode, RefSeq, VEGA | 97.12587 |
| <i>SOCS1</i>   | chr16:11348690-11349345   | 1  | 656  | Gencode, RefSeq, VEGA | 100      |
| <i>SRSF2</i>   | chr17:74731930-74733333   | 3  | 832  | Gencode, RefSeq       | 100      |
| <i>STAT3</i>   | chr17:40467753-40500544   | 23 | 2773 | Gencode, RefSeq, VEGA | 100      |
| <i>STAT5B</i>  | chr17:40353746-40384155   | 18 | 2724 | Gencode, RefSeq, VEGA | 100      |
| <i>SULT1A1</i> | chr16:28617132-28634528   | 9  | 1206 | Gencode, RefSeq, VEGA | 100      |
| <i>TAF1L</i>   | chr9:32630087-32635587    | 1  | 5501 | Gencode, RefSeq, VEGA | 100      |
| <i>TBL1XR1</i> | chr3:176743276-176782775  | 14 | 1825 | Gencode, RefSeq, VEGA | 100      |
| <i>TERT</i>    | chr5:1253833-1295114      | 16 | 3719 | Gencode, RefSeq, VEGA | 100      |
| <i>TET2</i>    | chr4:106111617-106197686  | 10 | 6365 | Gencode, RefSeq, VEGA | 100      |



|                 |                           |    |       |                       |          |
|-----------------|---------------------------|----|-------|-----------------------|----------|
| <i>TLL2</i>     | chr10:98127835-98273452   | 21 | 3468  | Gencode, RefSeq, VEGA | 100      |
| <i>TMEM30A</i>  | chr6:75965808-75994364    | 7  | 1226  | Gencode, RefSeq, VEGA | 100      |
| <i>TMPRSS2</i>  | chr21:42838059-42879941   | 14 | 1870  | Gencode, RefSeq, VEGA | 100      |
| <i>TNFAIP3</i>  | chr6:138192355-138202466  | 9  | 2558  | Gencode, RefSeq, VEGA | 100      |
| <i>TNFRSF14</i> | chr1:2488094-2494722      | 11 | 1321  | Gencode, RefSeq, VEGA | 100      |
| <i>TNK2</i>     | chr3:195591042-195623107  | 23 | 4483  | Gencode, RefSeq, VEGA | 100      |
| <i>TP53</i>     | chr17:7565247-7579922     | 14 | 1697  | Gencode, RefSeq, VEGA | 94.34296 |
| <i>TP73</i>     | chr1:3598920-3649653      | 14 | 2230  | Gencode, RefSeq, VEGA | 100      |
| <i>TRAF2</i>    | chr9:139780940-139820363  | 11 | 1954  | Gencode, RefSeq, VEGA | 96.72466 |
| <i>TRAF3</i>    | chr14:103336529-103372131 | 10 | 1907  | Gencode, RefSeq       | 100      |
| <i>TRAF7</i>    | chr16:2213912-2226585     | 20 | 2413  | Gencode, RefSeq, VEGA | 100      |
| <i>TRIP11</i>   | chr14:92436007-92506039   | 21 | 6360  | Gencode, RefSeq       | 100      |
| <i>TSC2</i>     | chr16:2098261-2138621     | 42 | 6297  | Gencode, RefSeq, VEGA | 100      |
| <i>TSC22D1</i>  | chr13:45008091-45150220   | 6  | 3605  | Gencode, RefSeq, VEGA | 100      |
| <i>TYK2</i>     | chr19:10461500-10489092   | 23 | 4324  | Gencode, RefSeq       | 100      |
| <i>TYMS</i>     | chr18:657733-673007       | 7  | 1082  | Gencode, RefSeq, VEGA | 100      |
| <i>U2AF1</i>    | chr21:44513202-44527614   | 9  | 970   | Gencode, RefSeq, VEGA | 93.40206 |
| <i>VPREB1</i>   | chr22:22599205-22599759   | 2  | 489   | Gencode, RefSeq, VEGA | 100      |
| <i>WDFY4</i>    | chr10:49917741-50190906   | 64 | 11323 | Gencode, RefSeq, VEGA | 100      |
| <i>WDR90</i>    | chr16:699407-717599       | 41 | 6175  | Gencode, RefSeq, VEGA | 100      |
| <i>WHSC1</i>    | chr4:1902372-1980646      | 23 | 4873  | Gencode, RefSeq, VEGA | 100      |

|                 |                          |    |      |                       |           |
|-----------------|--------------------------|----|------|-----------------------|-----------|
| <i>WT1</i>      | chr11:32410594-32456901  | 11 | 1784 | Gencode, RefSeq, VEGA | 100       |
| <i>WWOX</i>     | chr16:78133666-79246041  | 11 | 1937 | Gencode, RefSeq       | 100       |
| <i>ZRSR2</i>    | chrX:15808609-15841375   | 12 | 1930 | Gencode, RefSeq, VEGA | 86.476685 |
| <i>ABI3BP</i>   | chr3:100469329-100712259 | 67 | 6727 | Gencode, RefSeq, VEGA | 100       |
| <i>ACAD9</i>    | chr3:128598525-128631678 | 18 | 2612 | Gencode, RefSeq, VEGA | 100       |
| <i>ACE</i>      | chr17:61554446-61574931  | 27 | 4688 | Gencode, RefSeq, VEGA | 99.744026 |
| <i>ALOX12B</i>  | chr17:7976079-7990770    | 15 | 2406 | Gencode, RefSeq, VEGA | 100       |
| <i>ATP2C2</i>   | chr16:84402212-84497348  | 28 | 3488 | Gencode, RefSeq       | 100       |
| <i>BAI3</i>     | chr6:69348558-70098793   | 31 | 5287 | Gencode, RefSeq, VEGA | 100       |
| <i>BRD4</i>     | chr19:15349178-15383920  | 21 | 4747 | Gencode, RefSeq       | 100       |
| <i>BTG2</i>     | chr1:203274725-203276576 | 2  | 517  | Gencode, RefSeq, VEGA | 100       |
| <i>BTLA</i>     | chr3:112184945-112218215 | 5  | 970  | Gencode, RefSeq, VEGA | 100       |
| <i>C6ORF103</i> | chr6:146920167-147136363 | 39 | 6060 | Gencode, VEGA         | 100       |
| <i>C6ORF27</i>  | chr6:31733361-31744566   | 16 | 3024 | Gencode, VEGA         | 100       |
| <i>CAD</i>      | chr2:27440410-27466396   | 44 | 7726 | Gencode, RefSeq, VEGA | 100       |
| <i>CALR</i>     | chr19:13049484-13054737  | 9  | 1434 | Gencode, RefSeq       | 100       |
| <i>CAMTA1</i>   | chr1:6845581-7826592     | 27 | 5735 | Gencode, RefSeq, VEGA | 98.86661  |
| <i>CCT6B</i>    | chr17:33255057-33288422  | 14 | 1873 | Gencode, RefSeq       | 100       |
| <i>CD200</i>    | chr3:112052050-112080407 | 7  | 1025 | Gencode, RefSeq, VEGA | 100       |
| <i>CD274</i>    | chr9:5456104-5467872     | 6  | 993  | Gencode, RefSeq, VEGA | 100       |
| <i>CD70</i>     | chr19:6583301-6591023    | 4  | 841  | Gencode, RefSeq       | 92.98454  |

|                |                           |    |      |                       |           |
|----------------|---------------------------|----|------|-----------------------|-----------|
| <i>CD79A</i>   | chr19:42381365-42385057   | 5  | 781  | Gencode, RefSeq       | 100       |
| <i>CD79B</i>   | chr17:62006576-62009631   | 6  | 813  | Gencode, RefSeq       | 100       |
| <i>CD83</i>    | chr6:14118033-14135477    | 5  | 718  | Gencode, RefSeq, VEGA | 100       |
| <i>CDC73</i>   | chr1:193091321-193219852  | 17 | 1936 | Gencode, RefSeq, VEGA | 100       |
| <i>CDH17</i>   | chr8:95140458-95206923    | 17 | 2839 | Gencode, RefSeq, VEGA | 100       |
| <i>CDKN2B</i>  | chr9:22005976-22008962    | 2  | 538  | Gencode, RefSeq, VEGA | 100       |
| <i>CNOT3</i>   | chr19:54646705-54659155   | 20 | 3099 | Gencode, RefSeq, VEGA | 100       |
| <i>CNTNAP5</i> | chr2:124783218-125671875  | 24 | 4401 | Gencode, RefSeq, VEGA | 100       |
| <i>COL4A2</i>  | chr13:110960241-111164548 | 52 | 6296 | Gencode, RefSeq, VEGA | 100       |
| <i>CSF3R</i>   | chr1:36931687-36945107    | 16 | 3017 | Gencode, RefSeq, VEGA | 100       |
| <i>CXCR4</i>   | chr2:136872429-136875640  | 2  | 1126 | Gencode, RefSeq, VEGA | 100       |
| <i>CYP4F22</i> | chr19:15636138-15662292   | 12 | 1836 | Gencode, RefSeq       | 100       |
| <i>DDX3X</i>   | chrX:41193496-41206982    | 18 | 2526 | Gencode, RefSeq, VEGA | 100       |
| <i>DIS3</i>    | chr13:73333923-73355980   | 22 | 3385 | Gencode, RefSeq, VEGA | 100       |
| <i>DLGAP1</i>  | chr18:3499173-3880078     | 14 | 3535 | Gencode, RefSeq, VEGA | 100       |
| <i>DNMT3A</i>  | chr2:25457138-25536863    | 25 | 3388 | Gencode, RefSeq, VEGA | 100       |
| <i>DPP10</i>   | chr2:115200346-116599931  | 30 | 3175 | Gencode, RefSeq, VEGA | 100       |
| <i>DTX1</i>    | chr12:113495988-113534754 | 9  | 2043 | Gencode, RefSeq       | 99.216835 |
| <i>EBF1</i>    | chr5:158126109-158526496  | 17 | 2130 | Gencode, RefSeq, VEGA | 100       |
| <i>ECT2L</i>   | chr6:139134402-139223774  | 20 | 3115 | Gencode, RefSeq, VEGA | 100       |
| <i>EED</i>     | chr11:85956262-85989577   | 13 | 1665 | Gencode, RefSeq       | 94.29429  |

|                 |                           |    |       |                       |           |
|-----------------|---------------------------|----|-------|-----------------------|-----------|
| <i>EHD1</i>     | chr11:64621795-64647112   | 6  | 1767  | Gencode, RefSeq, VEGA | 100       |
| <i>EIF2C4</i>   | chr1:36274008-36319216    | 18 | 2946  | Gencode, VEGA         | 98.67617  |
| <i>EML2</i>     | chr19:46112911-46148712   | 26 | 3230  | Gencode, RefSeq       | 98.26626  |
| <i>ENTPD3</i>   | chr3:40429539-40469009    | 12 | 1959  | Gencode, RefSeq, VEGA | 99.795815 |
| <i>EPHB2</i>    | chr1:23037466-23240373    | 19 | 3628  | Gencode, RefSeq, VEGA | 96.63727  |
| <i>ETS1</i>     | chr11:128332246-128443035 | 10 | 1744  | Gencode, RefSeq       | 100       |
| <i>FAM129B</i>  | chr9:130269114-130341226  | 15 | 2557  | Gencode, RefSeq, VEGA | 100       |
| <i>FAM46C</i>   | chr1:118165481-118166676  | 1  | 1196  | Gencode, RefSeq, VEGA | 100       |
| <i>FAM5C</i>    | chr1:190067138-190424030  | 7  | 2441  | Gencode, RefSeq, VEGA | 100       |
| <i>FAT1</i>     | chr4:187509736-187630991  | 29 | 14602 | Gencode, RefSeq, VEGA | 100       |
| <i>FAT4</i>     | chr4:126237557-126412933  | 18 | 15434 | Gencode, RefSeq, VEGA | 100       |
| <i>FGL2</i>     | chr7:76825586-76829120    | 2  | 1360  | Gencode, RefSeq, VEGA | 100       |
| <i>FHIT</i>     | chr3:59737942-60522705    | 5  | 544   | Gencode, RefSeq, VEGA | 100       |
| <i>FTCD</i>     | chr21:47556358-47575447   | 15 | 2145  | Gencode, RefSeq, VEGA | 100       |
| <i>GATA3</i>    | chr10:8097609-8115996     | 5  | 1437  | Gencode, RefSeq, VEGA | 100       |
| <i>GNA12</i>    | chr7:2770805-2883805      | 7  | 1715  | Gencode, RefSeq, VEGA | 100       |
| <i>GRIK5</i>    | chr19:42503013-42569932   | 20 | 3775  | Gencode, RefSeq, VEGA | 100       |
| <i>HIST1H1E</i> | chr6:26156609-26157288    | 1  | 680   | Gencode, RefSeq, VEGA | 100       |
| <i>HLA-A</i>    | chr6:29910321-29913242    | 8  | 1276  | Gencode, RefSeq, VEGA | 100       |
| <i>HNRNPK</i>   | chr9:86584255-86593177    | 16 | 1817  | Gencode, RefSeq, VEGA | 100       |
| <i>IKZF2</i>    | chr2:213872074-214014917  | 12 | 2065  | Gencode, RefSeq, VEGA | 100       |
| <i>IL9R</i>     | chrX:155227399-155240084  | 10 | 1989  | Gencode, RefSeq, VEGA | 100       |

|               |                           |    |       |                       |           |
|---------------|---------------------------|----|-------|-----------------------|-----------|
| <i>IL9R</i>   | chrY:59330405-59343090    | 10 | 1989  | Gencode, RefSeq       | 100       |
| <i>KIFC3</i>  | chr16:57792786-57836934   | 22 | 3163  | Gencode, RefSeq, VEGA | 100       |
| <i>KLHL6</i>  | chr3:183209705-183273451  | 7  | 2006  | Gencode, RefSeq, VEGA | 100       |
| <i>LEF1</i>   | chr4:108969818-109088933  | 13 | 1635  | Gencode, RefSeq, VEGA | 100       |
| <i>MAGED1</i> | chrX:51637391-51645036    | 12 | 2745  | Gencode, RefSeq, VEGA | 100       |
| <i>MAP3K6</i> | chr1:27681799-27693098    | 30 | 4514  | Gencode, RefSeq, VEGA | 100       |
| <i>MAPK1</i>  | chr22:22123483-22221740   | 8  | 1243  | Gencode, RefSeq, VEGA | 100       |
| <i>MYB</i>    | chr6:135502642-135539128  | 19 | 3013  | Gencode, RefSeq, VEGA | 90.8397   |
| <i>MYH10</i>  | chr17:8379112-8526574     | 42 | 6882  | Gencode, RefSeq, VEGA | 100       |
| <i>NBEAL1</i> | chr2:203881098-204090883  | 55 | 9219  | Gencode, RefSeq, VEGA | 98.850204 |
| <i>NRXN2</i>  | chr11:64374658-64481181   | 24 | 5945  | Gencode, RefSeq, VEGA | 100       |
| <i>NT5C2</i>  | chr10:104849419-104934725 | 21 | 2269  | Gencode, RefSeq, VEGA | 100       |
| <i>P2RX5</i>  | chr17:3575738-3599309     | 13 | 1573  | Gencode, RefSeq, VEGA | 100       |
| <i>P2RY2</i>  | chr11:72945195-72946348   | 1  | 1154  | Gencode, RefSeq       | 100       |
| <i>PC</i>     | chr11:66616360-66639640   | 21 | 4179  | Gencode, RefSeq       | 100       |
| <i>PCBP1</i>  | chr2:70314866-70315956    | 1  | 1091  | Gencode, RefSeq, VEGA | 100       |
| <i>PCLO</i>   | chr7:82387881-82791918    | 29 | 16306 | Gencode, RefSeq, VEGA | 100       |
| <i>PDGFRA</i> | chr4:55106210-55161449    | 24 | 3930  | Gencode, RefSeq, VEGA | 97.88804  |
| <i>PER3</i>   | chr1:7844928-7902825      | 21 | 4057  | Gencode, RefSeq, VEGA | 100       |
| <i>PIK3R1</i> | chr5:67522494-67593439    | 19 | 2779  | Gencode, RefSeq, VEGA | 100       |
| <i>POLRMT</i> | chr19:617264-633522       | 21 | 4134  | Gencode, RefSeq       | 100       |
| <i>POR</i>    | chr7:75583301-75615809    | 17 | 2784  | Gencode, RefSeq, VEGA | 100       |

|                |                           |    |       |                       |           |
|----------------|---------------------------|----|-------|-----------------------|-----------|
| <i>POT1</i>    | chr7:124462572-124540896  | 20 | 2450  | Gencode, RefSeq, VEGA | 93.83674  |
| <i>PTPRN</i>   | chr2:220154938-220174064  | 25 | 3500  | Gencode, RefSeq, VEGA | 100       |
| <i>RAD21</i>   | chr8:117859729-117878978  | 13 | 2156  | Gencode, RefSeq, VEGA | 100       |
| <i>RANBP6</i>  | chr9:6012280-6015617      | 1  | 3338  | Gencode, RefSeq, VEGA | 100       |
| <i>RELN</i>    | chr7:103113249-103629813  | 66 | 11853 | Gencode, RefSeq, VEGA | 100       |
| <i>RHOA</i>    | chr3:49397632-49413032    | 6  | 944   | Gencode, RefSeq, VEGA | 70.12712  |
| <i>RIPK1</i>   | chr6:3077048-3113583      | 10 | 2216  | Gencode, RefSeq, VEGA | 100       |
| <i>RPL10</i>   | chrX:153626851-153637498  | 9  | 1250  | Gencode, RefSeq, VEGA | 100       |
| <i>RPL5</i>    | chr1:93297662-93307432    | 8  | 1058  | Gencode, RefSeq, VEGA | 100       |
| <i>RUNX1T1</i> | chr8:92972460-93115122    | 20 | 2750  | Gencode, RefSeq, VEGA | 98.07272  |
| <i>SALL3</i>   | chr18:76740265-76757332   | 3  | 3963  | Gencode, RefSeq, VEGA | 99.1673   |
| <i>SAMHD1</i>  | chr20:35521325-35580056   | 16 | 2205  | Gencode, RefSeq, VEGA | 100       |
| <i>SAPS2</i>   | chr22:50832328-50882686   | 22 | 3347  | VEGA                  | 100       |
| <i>SBF1</i>    | chr22:50885561-50913451   | 42 | 6568  | Gencode, RefSeq, VEGA | 97.8989   |
| <i>SETD1B</i>  | chr12:122242634-122268155 | 17 | 6112  | Gencode, RefSeq       | 100       |
| <i>SETD2</i>   | chr3:47058573-47205424    | 27 | 8312  | Gencode, RefSeq, VEGA | 98.97738  |
| <i>SLC29A2</i> | chr11:66130897-66139072   | 12 | 1611  | Gencode, RefSeq       | 100       |
| <i>SMARCA4</i> | chr19:11094818-11172502   | 39 | 6021  | Gencode, RefSeq       | 99.850525 |
| <i>SMC1A</i>   | chrX:53407014-53449559    | 26 | 4403  | Gencode, RefSeq, VEGA | 100       |
| <i>SMC3</i>    | chr10:112327565-112364070 | 29 | 4234  | Gencode, RefSeq, VEGA | 100       |
| <i>SPEN</i>    | chr1:16174553-16265932    | 16 | 11596 | Gencode, RefSeq, VEGA | 100       |

|                |                          |     |       |                       |           |
|----------------|--------------------------|-----|-------|-----------------------|-----------|
| <i>SRC</i>     | chr20:36012547-36031792  | 12  | 1869  | Gencode, RefSeq, VEGA | 100       |
| <i>STAG2</i>   | chrX:123156468-123234457 | 34  | 4541  | Gencode, RefSeq, VEGA | 100       |
| <i>STAT5B</i>  | chr17:40353746-40384155  | 18  | 2724  | Gencode, RefSeq, VEGA | 100       |
| <i>SUZ12</i>   | chr17:30264256-30326032  | 16  | 2540  | Gencode, RefSeq, VEGA | 100       |
| <i>SYNE1</i>   | chr6:152443561-152949476 | 151 | 30352 | Gencode, RefSeq, VEGA | 100       |
| <i>SYNGAP1</i> | chr6:33388032-33419693   | 21  | 4598  | Gencode, RefSeq, VEGA | 98.10787  |
| <i>SYPL1</i>   | chr7:105732241-105752985 | 7   | 1004  | Gencode, RefSeq, VEGA | 89.64143  |
| <i>TAL1</i>    | chr1:47685382-47691570   | 3   | 1062  | Gencode, RefSeq, VEGA | 100       |
| <i>TBC1D9B</i> | chr5:179289532-179334831 | 23  | 4406  | Gencode, RefSeq, VEGA | 100       |
| <i>TLR2</i>    | chr4:154624050-154626424 | 1   | 2375  | Gencode, RefSeq, VEGA | 100       |
| <i>TNFAIP3</i> | chr6:138192355-138202466 | 9   | 2558  | Gencode, RefSeq, VEGA | 100       |
| <i>TOX</i>     | chr8:59720296-60031556   | 9   | 1761  | Gencode, RefSeq, VEGA | 100       |
| <i>TP63</i>    | chr3:189349295-189612301 | 17  | 2756  | Gencode, RefSeq, VEGA | 91.43686  |
| <i>TPST2</i>   | chr22:26924177-26937606  | 4   | 1439  | Gencode, RefSeq, VEGA | 100       |
| <i>U2AF2</i>   | chr19:56166461-56185444  | 12  | 1668  | Gencode, RefSeq       | 100       |
| <i>UBR5</i>    | chr8:103266520-103424472 | 59  | 9580  | Gencode, RefSeq, VEGA | 100       |
| <i>XBP1</i>    | chr22:29191153-29196522  | 6   | 1369  | Gencode, RefSeq, VEGA | 100       |
| <i>XPO1</i>    | chr2:61705945-61761042   | 24  | 3717  | Gencode, RefSeq, VEGA | 100       |
| <i>ZFH4</i>    | chr8:77616314-77776811   | 13  | 11216 | Gencode, RefSeq, VEGA | 99.643364 |
| <i>ZMYM3</i>   | chrX:70460756-70473115   | 24  | 4617  | Gencode, RefSeq, VEGA | 100       |

|               |                         |    |      |                       |           |
|---------------|-------------------------|----|------|-----------------------|-----------|
| <i>ZNF229</i> | chr19:44932468-44947041 | 4  | 2558 | Gencode, RefSeq       | 100       |
| <i>CCND1</i>  | chr11:69456072-69466060 | 5  | 988  | Gencode, RefSeq       | 100       |
| <i>CYP3A4</i> | chr7:99355746-99381714  | 13 | 1811 | Gencode, RefSeq, VEGA | 100       |
| <i>PRPF8</i>  | chr17:1554086-1587875   | 44 | 7909 | Gencode, RefSeq, VEGA | 99.60804  |
| <i>SF1</i>    | chr11:64532851-64545874 | 14 | 2816 | Gencode, RefSeq, VEGA | 94.140625 |



**Table S6. Fusions/translocations targeted by the Pan-Heme v1.0 panel**

| <b>RefSeq Gene Identifiers (&gt;&gt; Translocation from Gene A to Gene B, C, etc.)</b>                      | <b>Interval Coordinates (Human Genome Build hg19)</b> | <b># Hybrid Capture Baits</b> | <b>Size of Targeted Region (bp)</b> | <b>Databases Used to Determine Coordinates</b> | <b>Bait Coverage of the Intended Targeted Regions</b> |
|-------------------------------------------------------------------------------------------------------------|-------------------------------------------------------|-------------------------------|-------------------------------------|------------------------------------------------|-------------------------------------------------------|
| <i>ABL1</i> >> <i>NUP214</i> ; <i>BCR</i> ; <i>ETV6</i>                                                     | chr9:133710862-133729500                              | 1                             | 18639                               | CustomRegion                                   | 85.45523                                              |
| <i>ALK</i> >> <i>ATIC</i> ; <i>TFG</i> ; <i>TPM4</i> ; <i>TPM3</i> ; <i>MSN</i> ; <i>CLTC</i> ; <i>NPM1</i> | chr2:29446344-29448376                                | 1                             | 2033                                | CustomRegion                                   | 100                                                   |
| <i>ATF1</i> >> <i>EWSR1</i> ; <i>FUS</i>                                                                    | chr12:51203322-51207842                               | 1                             | 4521                                | CustomRegion                                   | 74.25348                                              |
| <i>ATIC</i> >> <i>ALK</i>                                                                                   | chr2:216191651-216197154                              | 1                             | 5504                                | CustomRegion                                   | 80.19622                                              |
| <i>BCR</i> >> <i>ABL1</i> ; <i>FGFR1</i>                                                                    | chr22:23603677-23610644                               | 1                             | 6968                                | CustomRegion                                   | 88.719864                                             |
| <i>BCR</i> >> <i>ABL1</i> ; <i>JAK2</i>                                                                     | chr22:23631758-23632575                               | 1                             | 818                                 | CustomRegion                                   | 100                                                   |
| <i>CBFB</i> >> <i>MYH11</i>                                                                                 | chr16:67116192-67132662                               | 1                             | 16471                               | CustomRegion                                   | 75.10169                                              |
| <i>CLTC</i> >> <i>ALK</i>                                                                                   | chr17:57768022-57771138                               | 1                             | 3117                                | CustomRegion                                   | 89.18832                                              |
| <i>ERG</i> >> <i>EWSR1</i> ; <i>FUS</i>                                                                     | chr21:39755795-39762966                               | 1                             | 7172                                | CustomRegion                                   | 99.49805                                              |
| <i>ETV6</i> >> <i>PDGFRB</i> ; <i>NTRK3</i>                                                                 | chr12:12006445-12022407                               | 1                             | 15963                               | CustomRegion                                   | 88.91813                                              |
| <i>ETV6</i> >> <i>SYK</i> ; <i>ABL1</i> ; <i>RUNX1</i> ; <i>ABL2</i>                                        | chr12:12022853-12037428                               | 1                             | 14576                               | CustomRegion                                   | 92.48765                                              |
| <i>EWSR1</i> >> <i>ETV1</i> ; <i>WT1</i> ; <i>ETV4</i> ; <i>FLI1</i> ; <i>ERG</i> ; <i>ATF1</i>             | chr22:29683073-29684644                               | 1                             | 1572                                | CustomRegion                                   | 94.783714                                             |
| <i>EWSR1</i> >> <i>WT1</i> ; <i>ERG</i>                                                                     | chr22:29678496-29682961                               | 1                             | 4466                                | CustomRegion                                   | 56.09046                                              |
| <i>FGFR1OP</i> >> <i>FGFR1</i>                                                                              | chr6:167424331-167427045                              | 1                             | 2715                                | CustomRegion                                   | 96.05893                                              |
| <i>FIP1L1</i> >> <i>PDGFRA</i>                                                                              | chr4:54292082-54294243                                | 1                             | 2162                                | CustomRegion                                   | 94.07955                                              |
| <i>FUS</i> >> <i>CREB3</i> ; <i>L2DD</i> ; <i>IT3</i> ; <i>ATF1</i>                                         | chr16:31195667-31196309                               | 1                             | 643                                 | CustomRegion                                   | 76.82737                                              |

|                                                                                                                                                                                                     |                               |   |       |              |           |
|-----------------------------------------------------------------------------------------------------------------------------------------------------------------------------------------------------|-------------------------------|---|-------|--------------|-----------|
| <i>FUS</i> >><br><i>DDIT3</i> ;<br><i>CREB3L1</i> ;<br><i>ERG</i>                                                                                                                                   | chr16:31198107-<br>31199695   | 1 | 1589  | CustomRegion | 100       |
| <i>HIP1</i> >><br><i>PDGFRB</i>                                                                                                                                                                     | chr7:75167495-<br>75168692    | 1 | 1198  | CustomRegion | 92.40401  |
| <i>HOXA9</i> >><br><i>MSI2</i> ; <i>NUP98</i>                                                                                                                                                       | chr7:27203410-<br>27204546    | 1 | 1137  | CustomRegion | 100       |
| <i>ITK</i> >> <i>SYK</i>                                                                                                                                                                            | chr5:156641280-<br>156644926  | 1 | 3647  | CustomRegion | 100       |
| <i>MLL</i> >><br><i>ARHGEF12</i> ;<br><i>ELL</i> ; <i>MLLT4</i> ;<br><i>MLLT6</i> ;<br><i>MLLT10</i> ;<br><i>MLLT3</i> ;<br><i>EP300</i> ; <i>GMPS</i>                                              | chr11:118352757-<br>118353186 | 1 | 430   | CustomRegion | 100       |
| <i>MLL</i> >><br><i>EPS15</i> ;<br><i>ARHGEF12</i> ;<br><i>ELL</i> ; <i>MLLT4</i> ;<br><i>MLLT6</i> ;<br><i>MLLT3</i> ;<br><i>EP300</i> ; <i>SH3</i> ;<br><i>GL1</i> ; <i>GAS7</i> ;<br><i>GMPS</i> | chr11:118353160-<br>118354947 | 1 | 1788  | CustomRegion | 57.997765 |
| <i>MLL</i> >> <i>GAS7</i> ;<br><i>SEPT6</i> ;<br><i>MLLT4</i> ;<br><i>MLLT1</i> ; <i>LPP</i> ;<br><i>MLLT3</i> ;<br><i>EP300</i> ;<br><i>CREBBP</i> ;<br><i>GMPS</i>                                | chr11:118355640-<br>118359378 | 1 | 3739  | CustomRegion | 79.673706 |
| <i>MN1</i> >> <i>ETV6</i>                                                                                                                                                                           | chr22:28147034-<br>28192800   | 1 | 45767 | CustomRegion | 92.35475  |
| <i>MSI2</i> >><br><i>HOXA9</i>                                                                                                                                                                      | chr17:55693395-<br>55704639   | 1 | 11245 | CustomRegion | 91.13384  |
| <i>NPM1</i> >><br><i>MLF1</i>                                                                                                                                                                       | chr5:170819770-<br>170827206  | 1 | 7437  | CustomRegion | 67.16418  |
| <i>NUP98</i> >><br><i>DDX10</i> ;<br><i>HOXA13</i> ;<br><i>HOXD13</i> ;<br><i>RAP1</i> ; <i>GDS1</i> ;<br><i>NSD1</i> ; <i>HOXA9</i>                                                                | chr11:3756504-<br>3765788     | 1 | 9285  | CustomRegion | 70.2531   |
| <i>PAX5</i> >> <i>ETV6</i>                                                                                                                                                                          | chr9:37002723-<br>37006519    | 1 | 3797  | CustomRegion | 96.91862  |
| <i>PCM1</i> >><br><i>JAK2</i>                                                                                                                                                                       | chr8:17830146-<br>17838149    | 1 | 8004  | CustomRegion | 98.95052  |

|                                            |                          |   |        |                       |           |
|--------------------------------------------|--------------------------|---|--------|-----------------------|-----------|
| <i>PCM1</i> >> <i>RET</i>                  | chr8:17851078-17863821   | 1 | 12744  | CustomRegion          | 53.64093  |
| <i>PDGFRB</i> >> <i>TRIP11; HIP1; ETV6</i> | chr5:149506127-149509369 | 1 | 3243   | CustomRegion          | 94.38791  |
| <i>PICALM</i> >> <i>MLLT10</i>             | chr11:85692221-85692837  | 1 | 617    | CustomRegion          | 90.11346  |
| <i>RARA</i> >> <i>PML; NUMA1</i>           | chr17:38499069-38504617  | 1 | 5549   | CustomRegion          | 100       |
| <i>RBM15</i> >> <i>MKL1</i>                | chr1:110884840-110888210 | 1 | 3371   | CustomRegion          | 100       |
| <i>RUNX1</i> >> <i>CBFA2T3</i>             | chr21:36206848-36231820  | 1 | 24973  | CustomRegion          | 93.90141  |
| <i>SYK</i> >> <i>ITK; ETV6</i>             | chr9:93627329-93636535   | 1 | 9207   | CustomRegion          | 95.145    |
| <i>TCF3</i> >> <i>HLF</i>                  | chr19:1615770-1619159    | 1 | 3390   | CustomRegion          | 80.82596  |
| <i>TFG</i> >> <i>NTRK1; ALK</i>            | chr3:100451466-100455469 | 1 | 4004   | CustomRegion          | 87.26274  |
| <i>TPM4</i> >> <i>ALK</i>                  | chr19:16204358-16204543  | 1 | 186    | CustomRegion          | 100       |
| <i>CCND1</i>                               | chr11:69455845-69469252  | 1 | 13408  | Gencode, RefSeq       | 100       |
| <i>CDK6</i>                                | chr7:92234225-92465951   | 1 | 231727 | Gencode, RefSeq, VEGA | 90.39128  |
| <i>FGFR1</i>                               | chr8:38268646-38326362   | 1 | 57717  | Gencode, RefSeq, VEGA | 86.74048  |
| <i>JAK2</i>                                | chr9:4985023-5128193     | 1 | 143171 | Gencode, RefSeq, VEGA | 72.427376 |
| <i>TYK2</i>                                | chr19:10461194-10491362  | 1 | 30169  | Gencode, RefSeq       | 58.44078  |
| <i>WAC</i>                                 | chr10:28821412-28912051  | 1 | 90640  | Gencode, RefSeq, VEGA | 88.51059  |

**Table S7. Post-infusion adverse events**

| <b>Participant 1</b>                      |                  |                      |                 |
|-------------------------------------------|------------------|----------------------|-----------------|
| Pre-conditioning/Screening Period         |                  |                      |                 |
| <b>Adverse Event</b>                      | <b>Study Day</b> | <b>AE outcome</b>    | <b>Severity</b> |
| Epstein-Barr virus infection/reactivation | -376             | Recovered/Resolved   | Mild            |
| Human herpes virus infection/reactivation | -376             | Recovered/Resolved   | Mild            |
| Anxiety                                   | -360             | Recovered/Resolved   | Mild            |
| Hyperphosphatemia                         | -360             | Recovered/Resolved   | Mild            |
| Catheter site pain                        | -357             | Recovered/Resolved   | Moderate        |
| Cough                                     | -328             | Recovered/Resolved   | Mild            |
| Migraine                                  | -291             | Recovered/Resolved   | Mild            |
| Limb injury                               | -276             | Recovered/Resolved   | Moderate        |
| Catheter site pain                        | -234             | Recovered/Resolved   | Moderate        |
| Musculoskeletal chest pain                | -232             | Recovered/Resolved   | Mild            |
| Hidradenitis                              | -232             | Recovered/Resolved   | Severe          |
| Dry eyes                                  | -231             | Recovered/Resolved   | Mild            |
| Insomnia                                  | -231             | Recovered/Resolved   | Mild            |
| Dyspepsia                                 | -230             | Recovered/Resolved   | Moderate        |
| Anemia                                    | -229             | Recovered/Resolved   | Severe          |
| Constipation                              | -229             | Recovered/Resolved   | Mild            |
| Catheter site pain                        | -161             | Recovered/Resolved   | Moderate        |
| Nausea                                    | -159             | Recovered/Resolved   | Mild            |
| Hypoxia                                   | -158             | Recovered/Resolved   | Moderate        |
| Anemia                                    | -158             | Recovered/Resolved   | Severe          |
| Soft palate lesions                       | -158             | Recovered/Resolved   | Mild            |
| Soft tissue infection                     | -81              | Recovered/Resolved   | Moderate        |
| Dental caries                             | -19              | Recovered/Resolved   | Mild            |
| Blood bilirubin increased                 | -13              | Recovered/Resolved   | Mild            |
| Pain in extremity                         | -7               | Recovered/Resolved   | Mild            |
| Conditioning Period                       |                  |                      |                 |
| Protein total decreased                   | -6               | Recovered/Resolved   | Mild            |
| Nausea                                    | -5               | Recovered/Resolved   | Mild            |
| Anxiety                                   | -5               | Recovered/Resolved   | Moderate        |
| Aspartate aminotransferase increased      | -1               | Recovered/Resolved   | Mild            |
| Alanine aminotransferase increased        | -1               | Recovered/Resolved   | Mild            |
| Post-infusion Period                      |                  |                      |                 |
| Venous thrombosis limb                    | +1               | Recovered/Resolved   | Moderate        |
| Serum ferritin increased                  | +1               | Recovering/Resolving | Mild            |
| Anemia                                    | +2               | Recovered/Resolved   | Moderate        |

|                                           |      |                            |          |
|-------------------------------------------|------|----------------------------|----------|
| Insomnia                                  | +2   | Recovered/Resolved         | Moderate |
| Hyperphosphatemia                         | +3   | Recovered/Resolved         | Mild     |
| Stomatitis                                | +3   | Recovered/Resolved         | Severe   |
| Hyponatremia                              | +4   | Recovered/Resolved         | Mild     |
| Constipation                              | +4   | Recovered/Resolved         | Mild     |
| C-reactive protein increased              | +8   | Recovered/Resolved         | Moderate |
| Cytomegalovirus infection                 | +8   | Recovered/Resolved         | Mild     |
| Blood alkaline phosphatase increased      | +10  | Recovered/Resolved         | Mild     |
| Neutrophil count decreased                | +10  | Recovered/Resolved         | Severe   |
| Febrile neutropenia                       | +11  | Recovered/Resolved         | Severe   |
| Platelet count decreased                  | +11  | Recovered/Resolved         | Severe   |
| Drug overdose                             | +13  | Recovered/Resolved         | Severe   |
| Hypertension                              | +15  | Recovered/Resolved         | Moderate |
| Clostridium difficile                     | +22  | Recovered/Resolved         | Moderate |
| Vitamin D deficiency                      | +30  | Not Recovered/Not Resolved | Moderate |
| Proctalgia                                | +37  | Recovered/Resolved         | Moderate |
| Hyperpigmentation                         | +44  | Recovered/Resolved         | Moderate |
| Alanine aminotransferase increased        | +51  | Recovered/Resolved         | Mild     |
| Aspartate aminotransferase increased      | +51  | Recovered/Resolved         | Moderate |
| Blood lactate dehydrogenase increased     | +51  | Recovered/Resolved         | Mild     |
| COVID-19 infection                        | +110 | Recovered/Resolved         | Severe   |
| Sinusitis                                 | +121 | Recovered/Resolved         | Moderate |
| Aspartate aminotransferase increased      | +135 | Recovered/Resolved         | Mild     |
| Arthralgia                                | +169 | Recovered/Resolved         | Moderate |
| Alanine aminotransferase increased        | +169 | Recovered/Resolved         | Mild     |
| Arthralgia                                | +234 | Recovered/Resolved         | Moderate |
| Blood alkaline phosphatase increased      | +240 | Recovered/Resolved         | Mild     |
| Epstein-Barr virus                        | +275 | Recovered/Resolved         | Mild     |
| Lower respiratory tract infection (viral) | +275 | Recovered/Resolved         | Moderate |
| Anemia                                    | +275 | Recovered/Resolved         | Moderate |
| Flank pain                                | +314 | Recovered/Resolved         | Moderate |
| Hypertension                              | +329 | Recovered/Resolved         | Moderate |
| Pain in extremity                         | +329 | Recovered/Resolved         | Severe   |

|                                      |      |                            |          |
|--------------------------------------|------|----------------------------|----------|
| Priapism                             | +477 | Recovered/Resolved         | Moderate |
| Blood lactate dehydrogenase          | +484 | Not Recovered/Not Resolved | Mild     |
| Alanine aminotransferase increased   | +501 | Recovered/Resolved         | Mild     |
| Leukocytosis                         | +501 | Recovered/Resolved         | Mild     |
| Aspartate aminotransferase increased | +501 | Recovered/Resolved         | Mild     |
| Sickle cell anemia with crisis       | +501 | Recovered/Resolved         | Severe   |
| Hidradenitis                         | +501 | Recovering/Resolving       | Moderate |
| Hypertension                         | +501 | Not Recovered/Not Resolved | Severe   |
| Acute chest syndrome                 | +502 | Recovered/Resolved         | Severe   |
| Blood bilirubin increased            | +503 | Recovered/Resolved         | Mild     |
| Hypoalbuminemia                      | +504 | Recovered/Resolved         | Mild     |
| Blood alkaline phosphatase increased | +504 | Recovered/Resolved         | Mild     |
| Anemia                               | +506 | Recovered/Resolved         | Severe   |
| Headache                             | +507 | Recovered/Resolved         | Severe   |
| Road traffic accident                | +547 | Recovered/Resolved         | Severe   |
| <b>Participant 2</b>                 |      |                            |          |
| Pre-conditioning/Screening Period    |      |                            |          |
| Pain                                 | -379 | Recovered/Resolved         | Mild     |
| Nausea                               | -377 | Recovered/Resolved         | Mild     |
| Pain                                 | -293 | Recovered/Resolved         | Mild     |
| Edema peripheral                     | -292 | Recovered/Resolved         | Mild     |
| Hypomagnesaemia                      | -291 | Recovered/Resolved         | Mild     |
| Pain                                 | -279 | Recovered/Resolved         | Mild     |
| COVID-19 infection                   | -91  | Recovered/Resolved         | Mild     |
| Hyperphosphatemia                    | -63  | Recovered/Resolved         | Moderate |
| Chronic sinusitis                    | -41  | Recovered/Resolved         | Severe   |
| Hyperglycemia                        | -7   | Recovered/Resolved         | Mild     |
| Conditioning Period                  |      |                            |          |
| Aspartate aminotransferase increase  | -5   | Recovered/Resolved         | Mild     |
| Alanine aminotransferase increase    | -5   | Recovered/Resolved         | Moderate |
| Insomnia                             | -5   | Recovered/Resolved         | Mild     |
| Nausea                               | -3   | Recovered/Resolved         | Severe   |
| Post-infusion Period                 |      |                            |          |
| Anemia                               | +3   | Recovered/Resolved         | Moderate |
| Stomatitis                           | +5   | Recovered/Resolved         | Severe   |
| Neutrophil count decrease            | +8   | Recovered/Resolved         | Severe   |
| Febrile neutropenia                  | +11  | Recovered/Resolved         | Severe   |

|                                      |      |                            |          |
|--------------------------------------|------|----------------------------|----------|
| Platelet count decrease              | +11  | Recovered/Resolved         | Severe   |
| Constipation                         | +11  | Recovered/Resolved         | Mild     |
| Hypokalemia                          | +18  | Recovered/Resolved         | Severe   |
| Peripheral sensory neuropathy        | +20  | Recovered/Resolved         | Moderate |
| Arthralgia                           | +36  | Recovered/Resolved         | Moderate |
| Blood alkaline phosphatase increased | +85  | Recovered/Resolved         | Mild     |
| Aspartate aminotransferase increase  | +85  | Recovered/Resolved         | Moderate |
| Alanine aminotransferase increase    | +85  | Recovered/Resolved         | Moderate |
| Clostridium difficile test positive  | +106 | Recovered/Resolved         | Moderate |
| Iron overload                        | +108 | Not Recovered/Not Resolved | Severe   |
| Cough                                | +118 | Recovered/Resolved         | Moderate |
| Anemia                               | +120 | Recovered/Resolved         | Mild     |
| Cholelithiasis                       | +176 | Unknown                    | Mild     |
| Dermatitis                           | +176 | Not Recovered/Not Resolved | Mild     |
| Osteonecrosis                        | +196 | Recovered/Resolved         | Severe   |
| Anemia                               | +197 | Recovered/Resolved         | Mild     |
| Gastroesophageal reflux disease      | +226 | Recovered/Resolved         | Moderate |
| Sickle cell anemia with crisis       | +356 | Recovered/Resolved         | Severe   |
| <b>Participant 3</b>                 |      |                            |          |
| Pre-conditioning/Screening Period    |      |                            |          |
| Sickle cell anemia with crisis       | -399 | Recovering/Resolving       | Mild     |
| Abdominal pain                       | -385 | Recovering/Resolving       | Mild     |
| Sickle cell anemia with crisis       | -385 | Recovering/Resolving       | Mild     |
| Sickle cell anemia with crisis       | -381 | Recovering/Resolving       | Mild     |
| Anxiety                              | -371 | Recovered/Resolved         | Mild     |
| Vertigo                              | -371 | Recovered/Resolved         | Mild     |
| Constipation                         | -371 | Recovered/Resolved         | Mild     |
| Sickle cell anemia with crisis       | -371 | Recovered/Resolved         | Mild     |
| Nausea                               | -371 | Recovered/Resolved         | Mild     |
| Headaches                            | -368 | Recovered/Resolved         | Mild     |
| Osteonecrosis                        | -368 | Recovered/Resolved         | Mild     |
| Abdominal pain                       | -365 | Recovered/Resolved         | Mild     |
| Sickle cell anemia with crisis       | -350 | Recovered/Resolved         | Mild     |
| Dyspnea                              | -341 | Recovered/Resolved         | Mild     |
| Sickle cell anemia with crisis       | -341 | Recovered/Resolved         | Mild     |

|                                |      |                    |      |
|--------------------------------|------|--------------------|------|
| Ocular icterus                 | -331 | Recovered/Resolved | Mild |
| Sickle cell anemia with crisis | -328 | Recovered/Resolved | Mild |
| Abdominal pain                 | -325 | Recovered/Resolved | Mild |
| Diarrhea                       | -325 | Recovered/Resolved | Mild |
| Nausea                         | -325 | Recovered/Resolved | Mild |
| Upper-airway cough syndrome    | -325 | Recovered/Resolved | Mild |
| Sickle cell anemia with crisis | -325 | Recovered/Resolved | Mild |
| Vomiting                       | -325 | Recovered/Resolved | Mild |
| Vomiting                       | -321 | Recovered/Resolved | Mild |
| Non-cardiac chest pain         | -321 | Recovered/Resolved | Mild |
| Nausea                         | -321 | Recovered/Resolved | Mild |
| Sickle cell anemia with crisis | -321 | Recovered/Resolved | Mild |
| Fatigue                        | -320 | Recovered/Resolved | Mild |
| Non-cardiac chest pain         | -314 | Recovered/Resolved | Mild |
| Constipation                   | -301 | Recovered/Resolved | Mild |
| Headaches                      | -301 | Recovered/Resolved | Mild |
| Sickle cell anemia             | -301 | Recovered/Resolved | Mild |
| Fatigue                        | -301 | Recovered/Resolved | Mild |
| Temperature intolerance        | -301 | Recovered/Resolved | Mild |
| Prolonged menses               | -301 | Recovered/Resolved | Mild |
| Paranasal sinus discomfort     | -301 | Recovered/Resolved | Mild |
| Anxiety                        | -301 | Recovered/Resolved | Mild |
| Sickle cell anemia with crisis | -294 | Recovered/Resolved | Mild |
| Sickle cell anemia with crisis | -284 | Recovered/Resolved | Mild |
| Sickle cell anemia with crisis | -283 | Recovered/Resolved | Mild |
| Congestion                     | -264 | Recovered/Resolved | Mild |
| Nausea                         | -259 | Recovered/Resolved | Mild |
| Headache                       | -259 | Recovered/Resolved | Mild |
| Sickle cell anemia with crisis | -259 | Recovered/Resolved | Mild |
| Constipation                   | -245 | Recovered/Resolved | Mild |
| Post-nasal drip                | -245 | Recovered/Resolved | Mild |
| Sickle cell anemia with crisis | -245 | Recovered/Resolved | Mild |
| Congestion                     | -236 | Recovered/Resolved | Mild |
| COVID-19 infection             | -236 | Recovered/Resolved | Mild |
| Post-nasal drip                | -236 | Recovered/Resolved | Mild |
| Oropharyngeal pain             | -236 | Recovered/Resolved | Mild |
| Sickle cell anemia with crisis | -235 | Recovered/Resolved | Mild |



|                                |      |                    |      |
|--------------------------------|------|--------------------|------|
| Sickle cell anemia with crisis | -220 | Recovered/Resolved | Mild |
| Headaches                      | -219 | Recovered/Resolved | Mild |
| Sickle cell anemia with crisis | -206 | Recovered/Resolved | Mild |
| Vomiting                       | -189 | Recovered/Resolved | Mild |
| Sickle cell anemia with crisis | -185 | Recovered/Resolved | Mild |
| Sickle cell anemia with crisis | -182 | Recovered/Resolved | Mild |
| Constipation                   | -182 | Recovered/Resolved | Mild |
| Nausea                         | -173 | Recovered/Resolved | Mild |
| Vertigo                        | -171 | Recovered/Resolved | Mild |
| Sickle cell anemia with crisis | -168 | Recovered/Resolved | Mild |
| Vertigo                        | -168 | Recovered/Resolved | Mild |
| Anxiety                        | -161 | Recovered/Resolved | Mild |
| Urinary tract infection        | -160 | Recovered/Resolved | Mild |
| Sickle cell anemia with crisis | -157 | Recovered/Resolved | Mild |
| Sickle cell anemia with crisis | -153 | Recovered/Resolved | Mild |
| Vertigo                        | -153 | Recovered/Resolved | Mild |
| Sickle cell anemia with crisis | -143 | Recovered/Resolved | Mild |
| Post-nasal drip                | -143 | Recovered/Resolved | Mild |
| Sickle cell anemia with crisis | -140 | Recovered/Resolved | Mild |
| Sickle cell anemia with crisis | -125 | Recovered/Resolved | Mild |
| Abdominal pain                 | -119 | Recovered/Resolved | Mild |
| Sickle cell anemia with crisis | -117 | Recovered/Resolved | Mild |
| Sickle cell anemia with crisis | -101 | Recovered/Resolved | Mild |
| Sore throat                    | -101 | Recovered/Resolved | Mild |
| Sickle cell anemia with crisis | -98  | Recovered/Resolved | Mild |
| Sickle cell anemia with crisis | -81  | Recovered/Resolved | Mild |
| Sickle cell anemia with crisis | -71  | Recovered/Resolved | Mild |
| Congestion                     | -68  | Recovered/Resolved | Mild |
| Sickle cell anemia with crisis | -46  | Recovered/Resolved | Mild |
| Sickle cell anemia with crisis | -35  | Recovered/Resolved | Mild |
| Sickle cell anemia with crisis | -28  | Recovered/Resolved | Mild |

|                                |      |                      |          |
|--------------------------------|------|----------------------|----------|
| Sickle cell anemia with crisis | -23  | Recovered/Resolved   | Mild     |
| Sickle cell anemia with crisis | -14  | Recovered/Resolved   | Mild     |
| Osteonecrosis                  | -14  | Recovering/Resolving | Moderate |
| Fatigue                        | -12  | Recovered/Resolved   | Mild     |
| Non-cardiac chest pain         | -10  | Recovered/Resolved   | Mild     |
| <b>Conditioning Period</b>     |      |                      |          |
| Headache                       | -6   | Recovered/Resolved   | Mild     |
| Immunodeficiency               | -6   | Recovered/Resolved   | Mild     |
| Nausea                         | -4   | Recovered/Resolved   | Mild     |
| <b>Post-infusion Period</b>    |      |                      |          |
| Non-cardiac chest pain         | +2   | Recovered/Resolved   | Mild     |
| Constipation                   | +3   | Recovered/Resolved   | Mild     |
| Diarrhea                       | +4   | Recovered/Resolved   | Mild     |
| Weight increase                | +4   | Recovered/Resolved   | Mild     |
| Skin hyperpigmentation         | +6   | Recovering/Resolving | Mild     |
| Constipation                   | +7   | Recovered/Resolved   | Mild     |
| Abdominal pain                 | +8   | Recovered/Resolved   | Mild     |
| Stomatitis                     | +8   | Recovered/Resolved   | Mild     |
| Febrile neutropenia            | +9   | Recovered/Resolved   | Mild     |
| Diarrhea                       | +10  | Recovered/Resolved   | Mild     |
| Klebsiella infection           | +10  | Recovered/Resolved   | Mild     |
| Bacteremia                     | +10  | Recovered/Resolved   | Moderate |
| Dysuria                        | +11  | Recovered/Resolved   | Mild     |
| Vomiting                       | +11  | Recovered/Resolved   | Mild     |
| Colitis                        | +11  | Recovered/Resolved   | Mild     |
| Diarrhea                       | +12  | Recovered/Resolved   | Mild     |
| Vertigo                        | +15  | Recovered/Resolved   | Mild     |
| Diarrhea                       | +15  | Recovered/Resolved   | Mild     |
| Alopecia                       | +15  | Recovering/Resolving | Mild     |
| Anal abscess                   | +16  | Recovered/Resolved   | Mild     |
| Catheter site erythema         | +21  | Recovered/Resolved   | Mild     |
| Catheter site pruritus         | +21  | Recovered/Resolved   | Mild     |
| Catheter site papule           | +21  | Recovered/Resolved   | Mild     |
| Headache                       | +24  | Recovered/Resolved   | Mild     |
| Rhinorrhea                     | +24  | Recovered/Resolved   | Mild     |
| Rash erythematous              | +29  | Recovered/Resolved   | Mild     |
| Nausea                         | +29  | Recovered/Resolved   | Mild     |
| Hematochezia                   | +43  | Recovered/Resolved   | Mild     |
| Constipation                   | +43  | Recovered/Resolved   | Mild     |
| Pain in jaw                    | +57  | Recovered/Resolved   | Mild     |
| Non-cardiac chest pain         | +92  | Recovered/Resolved   | Mild     |
| Non-cardiac chest pain         | +99  | Recovered/Resolved   | Mild     |
| Vomiting                       | +99  | Recovered/Resolved   | Mild     |
| Nausea                         | +99  | Recovered/Resolved   | Mild     |
| Headache                       | +99  | Recovered/Resolved   | Mild     |
| Constipation                   | +118 | Recovered/Resolved   | Mild     |
| Vomiting                       | +141 | Recovered/Resolved   | Mild     |

|                     |      |                      |      |
|---------------------|------|----------------------|------|
| Peripheral swelling | +141 | Recovered/Resolved   | Mild |
| Abdominal pain      | +141 | Recovering/Resolving | Mild |
| Nausea              | +143 | Recovering/Resolving | Mild |
| Vomiting            | +152 | Recovered/Resolved   | Mild |
| Vomiting            | +161 | Recovered/Resolved   | Mild |
| Constipation        | +162 | Recovering/Resolving | Mild |
| Vomiting            | +177 | Recovering/Resolving | Mild |

**Table S8. Summary of laboratory values for the trial participants at various timepoints after OTQ923 infusion**

| Lab Test                                               | Normal Range | Participant 1 |             |             |             |              | Participant 2 |             |             |              | Participant 3 |             |             |
|--------------------------------------------------------|--------------|---------------|-------------|-------------|-------------|--------------|---------------|-------------|-------------|--------------|---------------|-------------|-------------|
|                                                        |              | Screening     | Month 3     | Month 6     | Month 12    | Month 18     | Screening     | Month 3     | Month 6     | Month 12     | Screening     | Month 3     | Month 6     |
| <b>Chemistry</b>                                       |              |               |             |             |             |              |               |             |             |              |               |             |             |
| Creatinine (µmol/L)                                    | 40–110       | 69            | 61          | 69          | 60          | 57           | 54            | 40          | -           | 54           | 62            | 49          | 46          |
| Aspartate aminotransferase (U/L)                       | 8–40         | 39            | 36          | 30          | 24          | <b>206</b>   | <b>51</b>     | <b>88</b>   | <b>191</b>  | <b>45</b>    | <b>43</b>     | <b>66</b>   | 33          |
| Alanine aminotransferase (U/L)                         | 5–48         | 23            | 45          | 29          | 23          | <b>176</b>   | 33            | <b>112</b>  | <b>295</b>  | <b>91</b>    | 35            | <b>71</b>   | 29          |
| Total bilirubin (µmol/L)                               | 3–21         | <b>26</b>     | <b>24</b>   | <b>48</b>   | <b>43</b>   | <b>56</b>    | <b>60</b>     | <b>32</b>   | <b>65</b>   | <b>72</b>    | <b>67</b>     | <b>31</b>   | <b>31</b>   |
| Alkaline phosphatase (U/L)                             | 40–129       | 72            | 112         | 102         | 117         | 119          | 80            | <b>133</b>  | <b>168</b>  | <b>130</b>   | 107           | 102         | 105         |
| <b>Hematology</b>                                      |              |               |             |             |             |              |               |             |             |              |               |             |             |
| Hemoglobin (g/dL)                                      | 14–17        | <b>10.0</b>   | <b>12.6</b> | <b>11.4</b> | <b>10.3</b> | <b>11.9</b>  | <b>7.6</b>    | <b>11.9</b> | <b>11.2</b> | <b>11.5</b>  | <b>10</b>     | <b>10.5</b> | <b>10.1</b> |
| Hematocrit (%)                                         | 39–54        | <b>31</b>     | <b>36</b>   | <b>34</b>   | <b>29</b>   | <b>32</b>    | <b>22</b>     | <b>34</b>   | <b>33</b>   | <b>32.1</b>  | <b>29.9</b>   | <b>30.7</b> | <b>28.7</b> |
| Mean corpuscular volume (MCV) (fL)                     | 79–96        | 81            | <b>99</b>   | <b>102</b>  | <b>98</b>   | <b>100.9</b> | 91            | 94          | <b>98</b>   | 95.3         | 89.5          | 92.5        | 98.3        |
| Mean corpuscular hemoglobin (MCH) (pg)                 | 26–34        | 26            | 34          | <b>36</b>   | 33          | <b>37.5</b>  | 32            | 32          | 34          | <b>34.1</b>  | 29.9          | 31.6        | <b>34.6</b> |
| Mean corpuscular hemoglobin concentration (MCHC) (g/L) | 310–380      | 320           | 350         | 350         | 340         | 372          | 350           | 340         | 340         | 358          | 334           | 342         | 352         |
| Leukocytes (10 <sup>9</sup> /L)                        | 3.8–10.7     | 10.49         | 9.81        | 3.94        | 5.86        | 7.78         | <b>8.74</b>   | 8.5         | 7.96        | <b>16.6</b>  | <b>15.5</b>   | 5.8         | 8.0         |
| Absolute Neutrophil Count (10 <sup>6</sup> /L)         | 2093–6072    | <b>12224</b>  | <b>6718</b> | 2517        | 3500        | 4894         | <b>7266</b>   | 3183        | 3713        | <b>10936</b> | 5800          | 3940        | 4540        |

|                                                |          |             |      |      |      |      |            |      |      |      |      |      |      |
|------------------------------------------------|----------|-------------|------|------|------|------|------------|------|------|------|------|------|------|
| Absolute Lymphocyte Count (10 <sup>6</sup> /L) | 940-3075 | <b>3242</b> | 2565 | 1929 | 2207 | 2069 | 2460       | 2909 | 2055 | 2842 | 1600 | 1020 | 2020 |
| Platelets (10 <sup>9</sup> /L)                 | 140-400  | <b>538</b>  | 179  | 316  | 371  | 308  | <b>447</b> | 166  | 300  | 261  | 327  | 200  | 226  |

Abnormal values are **bolded**



## References

1. Traxler EA, Yao Y, Wang Y-D, et al. A genome-editing strategy to treat  $\beta$ -hemoglobinopathies that recapitulates a mutation associated with a benign genetic condition. *Nat Med* 2016;22(9):987-90. DOI: 10.1038/nm.4170.
2. Yen J, Fiorino M, Liu Y, et al. TRIAMF: A new method for delivery of Cas9 ribonucleoprotein complex to human hematopoietic stem cells. *Sci Rep* 2018;8(1):16304. DOI: 10.1038/s41598-018-34601-6.
3. Canver MC, Smith EC, Sher F, et al. *BCL11A* enhancer dissection by Cas9-mediated *in situ* saturating mutagenesis. *Nature* 2015;527(7577):192-7. DOI: 10.1038/nature15521.
4. Bae S, Park J, Kim J-S. Cas-OFFinder: a fast and versatile algorithm that searches for potential off-target sites of Cas9 RNA-guided endonucleases. *Bioinformatics* 2014;30(10):1473-5. DOI: 10.1093/bioinformatics/btu048.
5. Cho SW, Kim S, Kim Y, et al. Analysis of off-target effects of CRISPR/Cas-derived RNA-guided endonucleases and nickases. *Genome Res* 2014;24(1):132-41. DOI: 10.1101/gr.162339.113.
6. Wang X, Wang Y, Wu X, et al. Unbiased detection of off-target cleavage by CRISPR-Cas9 and TALENs using integrase-defective lentiviral vectors. *Nat Biotechnol* 2015;33(2):175-8. DOI: 10.1038/nbt.3127.
7. Li H, Durbin R. Fast and accurate short read alignment with Burrows–Wheeler transform. *Bioinformatics* 2009;25(14):1754-60. DOI: 10.1093/bioinformatics/btp324.
8. Pruitt KD, Brown GR, Hiatt SM, et al. RefSeq: an update on mammalian reference sequences. *Nucleic Acids Res* 2014;42(Database issue):D756-D763. DOI: 10.1093/nar/gkt1114.
9. Forbes SA, Beare D, Boutselakis H, et al. COSMIC: somatic cancer genetics at high-resolution. *Nucleic Acids Res* 2017;45(D1):D777-D783. DOI: 10.1093/nar/gkw1121.
10. Cibulskis K, Lawrence MS, Carter SL, et al. Sensitive detection of somatic point mutations in impure and heterogeneous cancer samples. *Nat Biotechnol* 2013;31(3):213-9. DOI: 10.1038/nbt.2514.
11. Ye K, Schulz MH, Long Q, Apweiler R, Ning Z. Pindel: a pattern growth approach to detect break points of large deletions and medium sized insertions from paired-end short reads. *Bioinformatics* 2009;25(21):2865-71. DOI: 10.1093/bioinformatics/btp394.
12. Cameron P, Fuller CK, Donohoue PD, et al. Mapping the genomic landscape of CRISPR-Cas9 cleavage. *Nat Methods* 2017;14(6):600-6. DOI: 10.1038/nmeth.4284.
13. Kent WJ, Sugnet CW, Furey TS, et al. The human genome browser at UCSC. *Genome Res* 2002;12(6):996-1006. DOI: 10.1101/gr.229102.
14. Lai Z, Markovets A, Ahdesmaki M, et al. VarDict: a novel and versatile variant caller for next-generation sequencing in cancer research. *Nucleic Acids Res* 2016;44(11):e108. DOI: 10.1093/nar/gkw227.
15. Giannoukos G, Ciulla DM, Marco E, et al. UDiTaS, a genome editing detection method for indels and genome rearrangements. *BMC Genomics* 2018;19(1):212. DOI: 10.1186/s12864-018-4561-9.
16. Untergasser A, Cutcutache I, Koressaar T, et al. Primer3—new capabilities and interfaces. *Nucleic Acids Res* 2012;40(15):e115. DOI: 10.1093/nar/gks596.
17. Heller D, Vingron M. SVIM: structural variant identification using mapped long reads. *Bioinformatics* 2019;35(17):2907-15. DOI: 10.1093/bioinformatics/btz041.
18. Heinz S, Benner C, Spann N, et al. Simple combinations of lineage-determining transcription factors prime *cis*-regulatory elements required for macrophage and B cell identities. *Mol Cell* 2010;38(4):576-89. DOI: 10.1016/j.molcel.2010.05.004.
19. Sharma A, Leonard A, West K, et al. Optimizing haematopoietic stem and progenitor cell apheresis collection from plerixafor-mobilized patients with sickle cell disease. *Br J Haematol* 2022;198(4):740-4. DOI: 10.1111/bjh.18311.

20. Boitano AE, Wang J, Romeo R, et al. Aryl hydrocarbon receptor antagonists promote the expansion of human hematopoietic stem cells. *Science* 2010;329(5997):1345-8. DOI: 10.1126/science.1191536.
21. Koelle SJ, Espinoza DA, Wu C, et al. Quantitative stability of hematopoietic stem and progenitor cell clonal output in rhesus macaques receiving transplants. *Blood* 2017;129(11):1448-57. DOI: 10.1182/blood-2016-07-728691.
22. Sayers EW, Agarwala R, Bolton EE, et al. Database resources of the National Center for Biotechnology Information. *Nucleic Acids Res* 2019;47(D1):D23-D28. DOI: 10.1093/nar/gky1069.
23. Liu N, Xu S, Yao Q, et al. Transcription factor competition at the  $\gamma$ -globin promoters controls hemoglobin switching. *Nat Genet* 2021;53(4):511-20. DOI: 10.1038/s41588-021-00798-y.
24. Doerfler PA, Feng R, Li Y, et al. Activation of  $\gamma$ -globin gene expression by GATA1 and NF-Y in hereditary persistence of fetal hemoglobin. *Nat Genet* 2021;53(8):1177-86. DOI: 10.1038/s41588-021-00904-0.
